# Supplementary material for: Phosphorylation of P-stalk proteins defines the ribosomal state for interaction with auxiliary protein factors
Source: Springer Nature journal article supplement (doi:10.1038/s44319-024-00297-1), 2024-10-28
Supplement: MOESM1 [file 44319_2024_297_MOESM1_ESM.pdf › 44319_2024_297_MOESM1_ESM.pdf]

## **Appendix for**

### **Phosphorylation of P-stalk proteins defines the ribosomal state for interaction with auxiliary protein factors**

†Kamil Filipek and †Sandra Blanchet, et al.

†Contributed equally

\*Corresponding authors

Kyle W. Cunningham - [kwc@jhu.edu](mailto:kwc@jhu.edu)

Rachel Green - [ragreen@jhmi.edu](mailto:ragreen@jhmi.edu)

Marina V. Rodnina - [rodnina@mpinat.mpg.de](mailto:rodnina@mpinat.mpg.de)

Marek Tchórzewski - [marek.tchorzewski@mail.umcs.pl](mailto:marek.tchorzewski@mail.umcs.pl)

## Table of Contents

Appendix Figures ----- #3 - 22

- Fig. S1 ----- #3
- Fig. S2 ----- #4
- Fig. S3 ----- #5
- Fig. S4 ----- #6
- Fig. S5 ----- #8-7
- Fig. S6 ----- #9
- Fig. S7 ----- #10
- Fig. S8 ----- #11-12
- Fig. S9 ----- #13
- Fig. S10 ----- #14
- Fig. S11 ----- #15
- Fig. S12 ----- #16
- Fig. S13 ----- #17-18
- Fig. S14 ----- #19-20
- Fig. S15 ----- #21
- Fig. S16 ----- #22

Appendix Table

- Table S1 ----- #23 - 26

## Appendix Figure S1

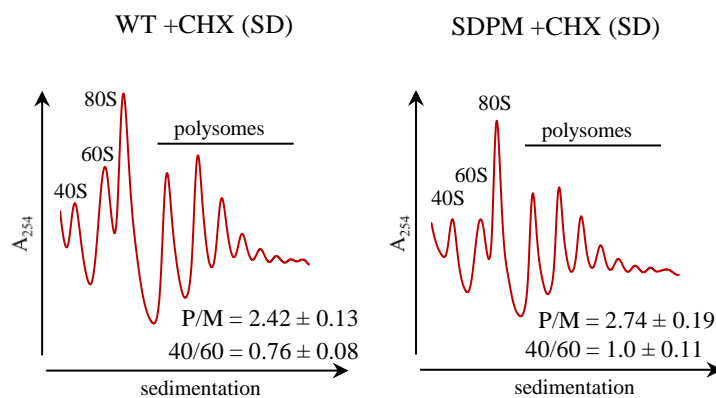

### Appendix Figure S1. Polysome profile analyses from the WT and SDPM yeast strains grown on SD minimal medium supplemented with full set of amino acids.

The polysome-to-monosome (P/M) ratio was calculated for each profile by dividing the area of the first four polysomal peaks by the area of the peak for the 80S monosome. P/M value is presented as means  $\pm$  SD ( $n = 3$ ). The sedimentation vector of the ribosomal fractions is indicated by a horizontal arrow, and the optical density value at 254 nm is shown on the y-axis; the positions of individual ribosomal subunits are indicated.

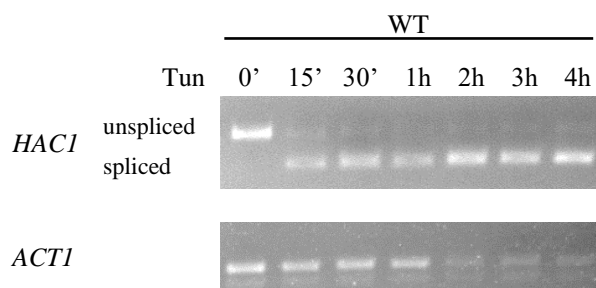

**Appendix Figure S2. PCR analysis of *HAC1* mRNA splicing .** The time course of *HAC1* mRNA splicing was analyzed by PCR. The analysis was performed in the presence of tunicamycin (Tun) at a concentration of 2.5  $\mu\text{g/ml}$ . 0' - control, without Tun, and the analysis was performed after 15, 30 minutes and 1, 2, 3 and 4 hours. *ACT1* - reference, analysis of the mRNA level for actin. Briefly, the cells were grown in YPD medium (1% yeast extract, 2% peptone, 2% dextrose) to an OD600 of 0.5 and treated with Tun to the final concentration, 2.5  $\mu\text{g/ml}$  for 15 min, 30 min, 1h, 2h, 3h, 4h and then harvested by centrifugation at 3000  $\times g$  and subsequently flash-frozen in liquid nitrogen for storage. Total RNA was extracted from the cells following hot phenol method. The RNA samples obtained were subjected to DNase treatment with a TURBO DNA-free kit according to the manufacturer's protocol (Ambion). 200 ng of RNA were used as a template for cDNA synthesis reaction which was set up in the volume of 20  $\mu\text{l}$  using 200 U of SuperScript IV Reverse Transcriptase (Invitrogen). 10x Reverse Transcripton Random Primers (Applied Biosystems) were used in the reaction. cDNA was used as a template for PCR reaction and products were analyzed on 1% agarose gel. *HAC1* was amplified using the primers 5'-CACTCGTCGTCTGATACG-3' and 5'-CATTCAATTCAAATGAATTCAAACCTG-3', results in products 577 bp long for unspliced *HAC1* mRNA and 325 bp long for spliced mRNA. *ACT1* was amplified with primers 5'-CTGGTATGTTCTAGCGCTTG-3' and 5'-GATACCTTGGTGTCTTGGTC-3' results in products 431 bp long.

## Appendix Figure. S3

### Human - *Homo sapiens*

(uL10 - #P05388, P1 - #P05386, P2 - #P05387)

P1 - K<sup>1</sup>VEAKKEE**SEES**DDDDMGFGLFD<sup>22</sup>

P2 - K<sup>1</sup>KDEKKEE**SEES**DDDDMGFGLFD<sup>22</sup>

uL10 - A<sup>1</sup>KVEAKEE**SEES**DEDDMGFGLFD<sup>22</sup>

### Yeast - *Saccharomyces cerevisiae*

(uL10 - #P05317, P1A - #P05318, P1B - #P10622, P2A - #P05319, P2B - #P02400)

P1A - A<sup>1</sup>EKEEEEAKEE**S**DDDDMGFGLFD<sup>22</sup>

P2B - E<sup>1</sup>EEKEEEEAKEE**S**DDDDMGFGLFD<sup>22</sup>

P1B - E<sup>1</sup>EEKEEEEAAEE**S**DDDDMGFGLFD<sup>22</sup>

P2A - E<sup>1</sup>EEKEEEEAAEE**S**DDDDMGFGLFD<sup>22</sup>

uL10 - A<sup>1</sup>EEAAEEEEEE**S**DDDDMGFGLFD<sup>22</sup>

### Archaea - *Haloarcula marismortui*

(uL10 - #P15825, P1 - #P15772)

P1 - G<sup>1</sup>GDDDDDEDDEASGEGLGELFG<sup>22</sup>

uL10 - A<sup>1</sup>EEADDDDDDEDAGDALGAMF<sup>22</sup>

**Appendix Figure S3. The C-terminal polypeptide used for the MD simulation.** The UniProt numbers for each P-stalk protein are given in parentheses. Phosphorylated serine residues are shown in bold; superscript numbers indicate the position of each residue within the peptide.

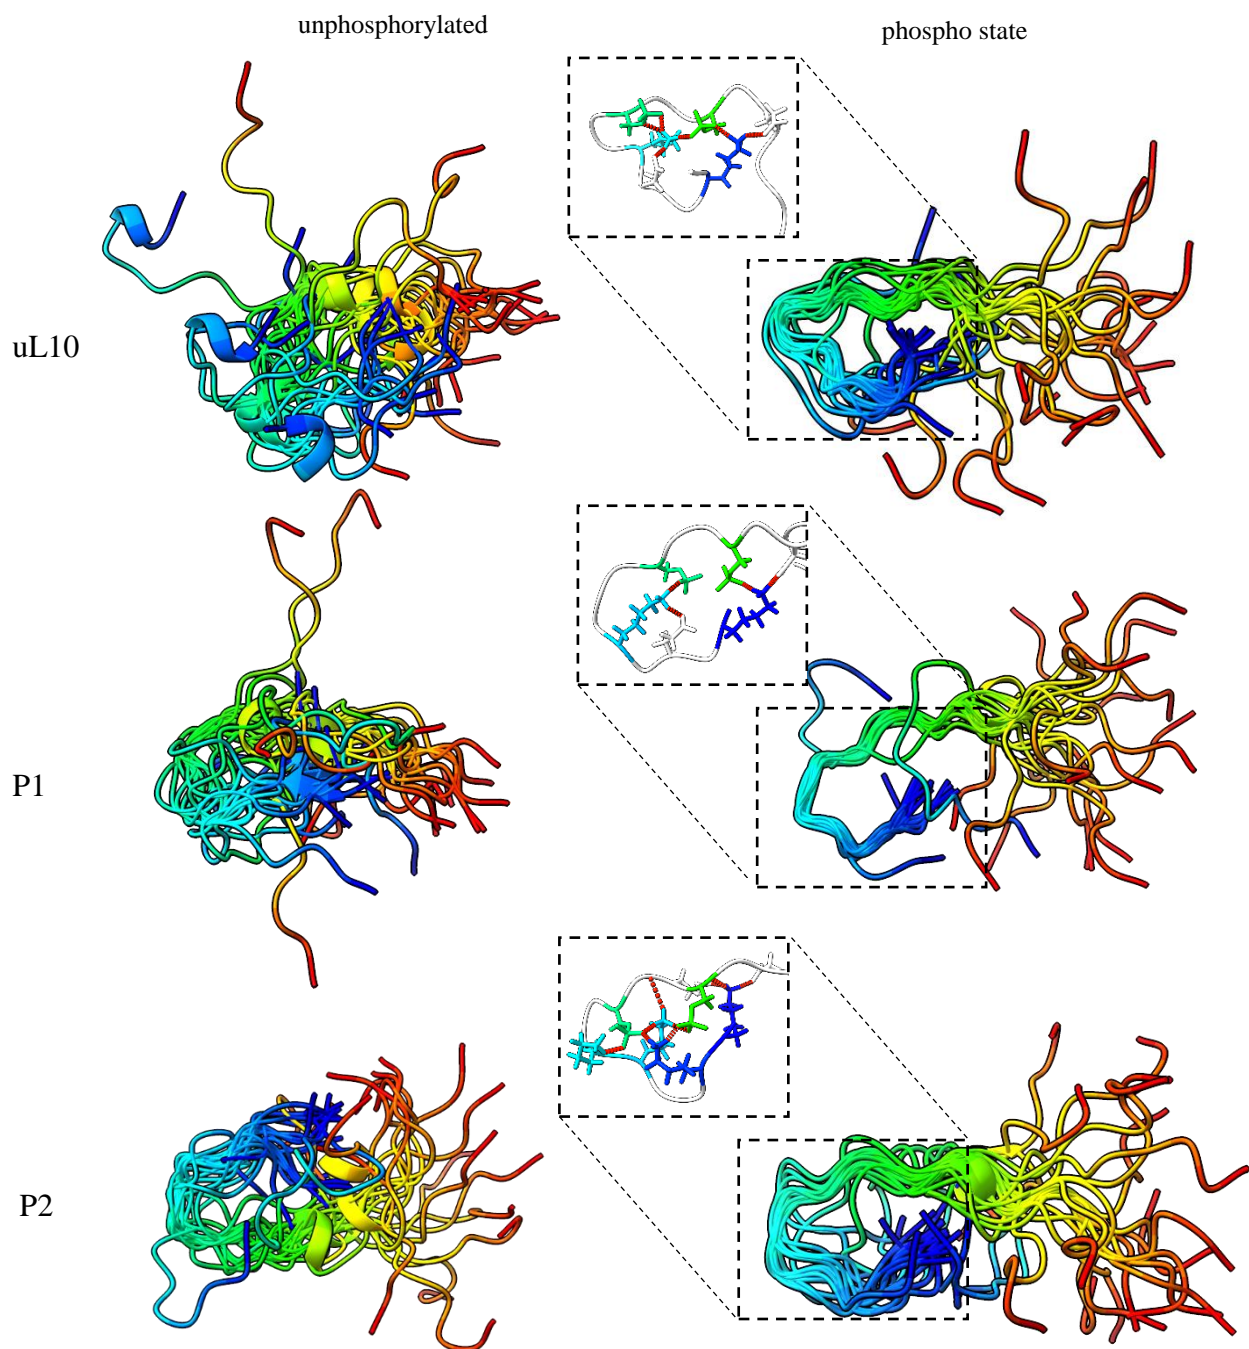

**Figure S4. Molecular dynamics simulation of ribosomal P-stalk CTDs belonging to human uL10, P1 and P2 proteins as unphosphorylated and phosphorylated peptides. Medoids of the 20 highest scoring structures obtained for each type of CTD are shown. Insets - the peptide was shown with two phosphorylated serine residues (green) and lysine residues (light and dark blue); hydrogen bonds - red.**

# Appendix Figure. S5

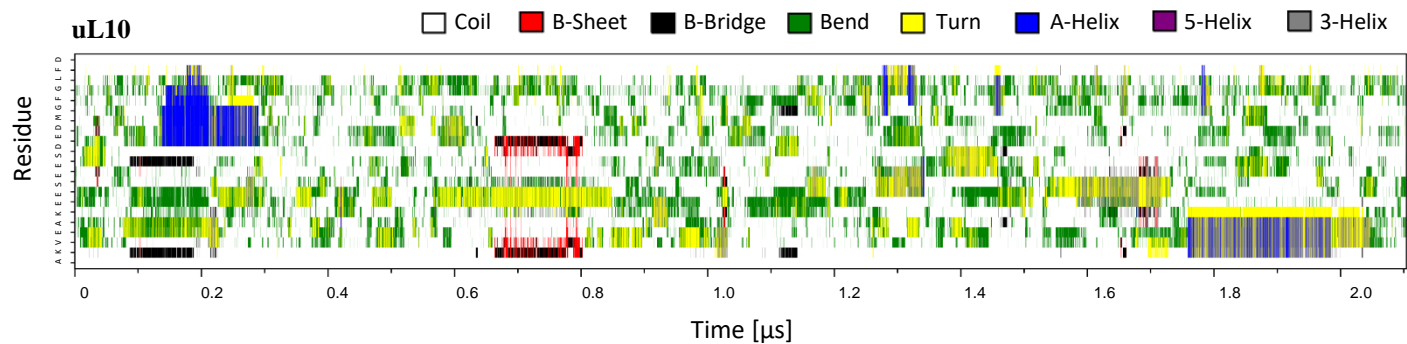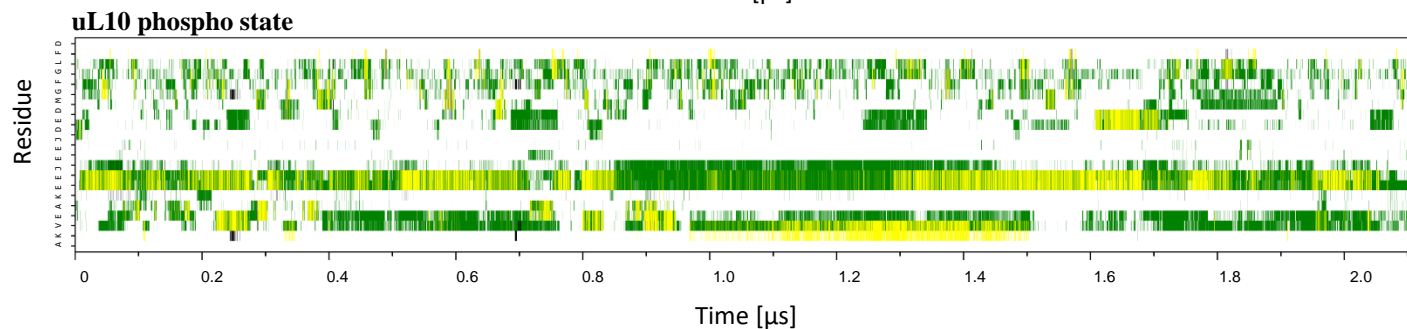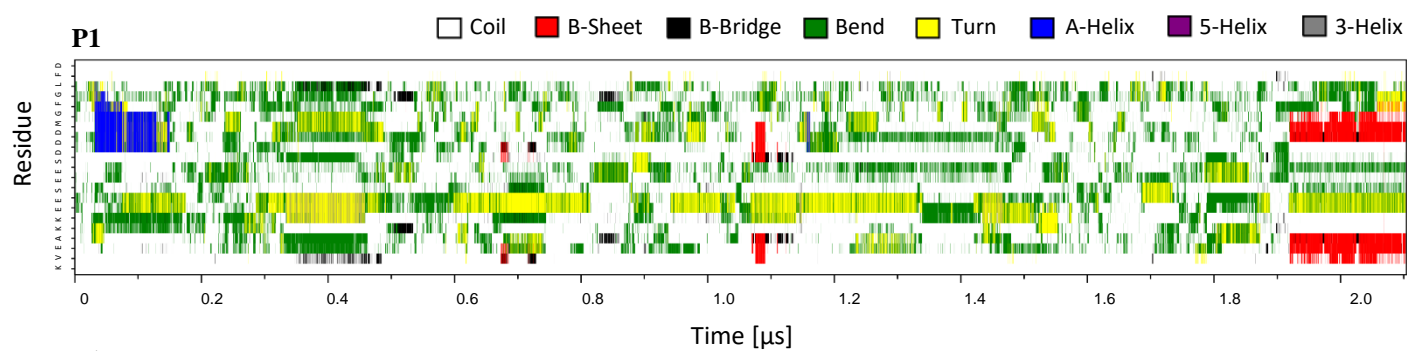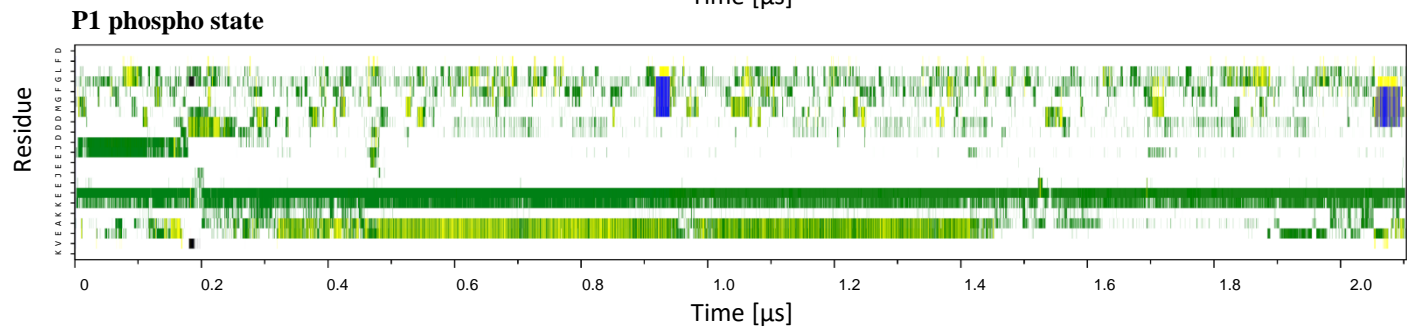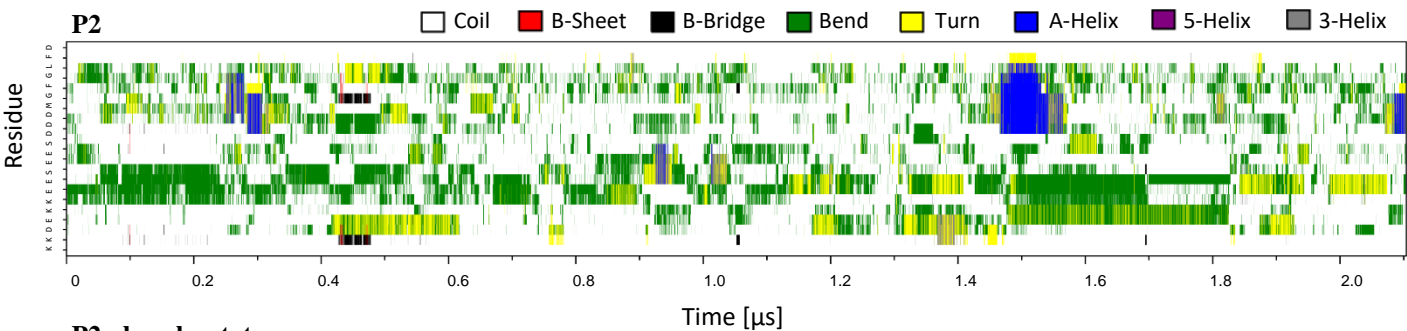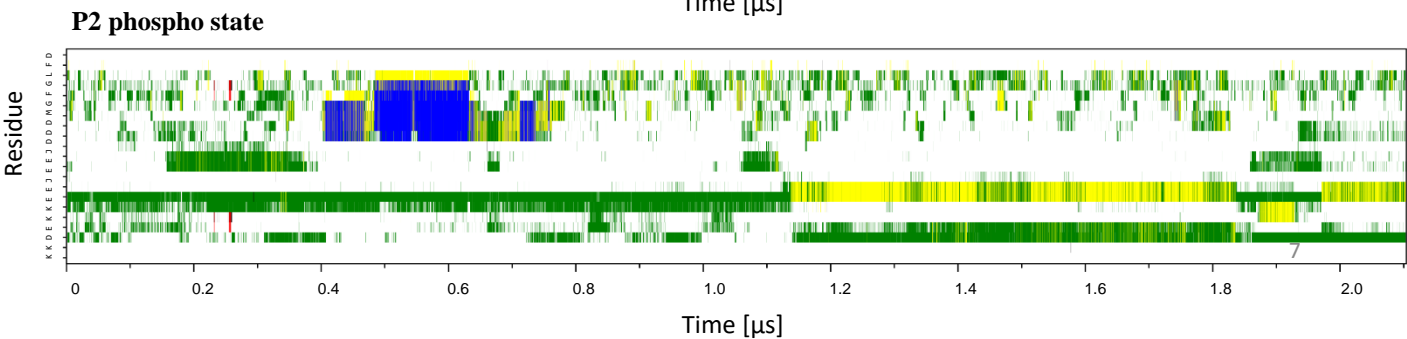

**Appendix Figure S5. MD simulation of the linear polypeptide chain.** The graph shows the occurrence of secondary structures versus time for the C-terminal peptides of human P proteins (uL10, P1, P2) folding in unphosphorylated and phospho residues. Secondary structure presented for individual peptide residues (vertical axis) vs. simulation time (horizontal axis) plot for unphosphorylated and phosphorylated human P-protein C-termini peptide folding. The structures were marked with individual color as marked in the legend. On the X - time of simulation, Y - position of individual amino acid residues, with phosphoserine marked as J.

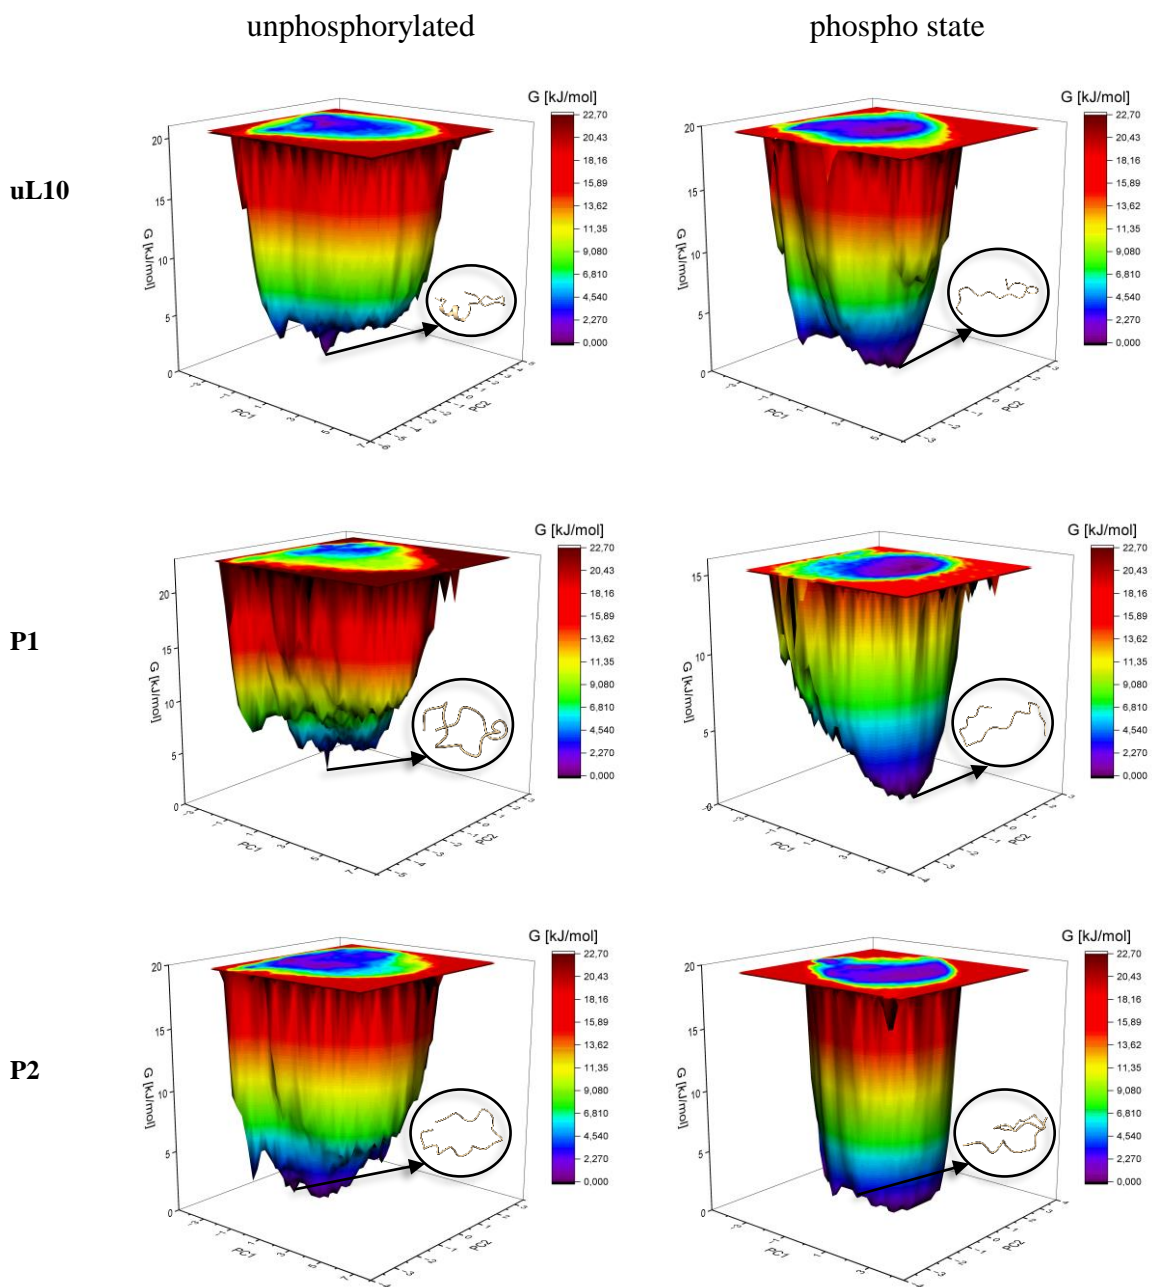

**Appendix Figure S6. Free energy landscapes mapping of possible states of P-proteins (uL10, P1, P2) C-termini peptides folding in wild type (left side) and phospho state (right side) from *H.sapiens*; inset – representative lowest energy structures sampled during MD simulation.**

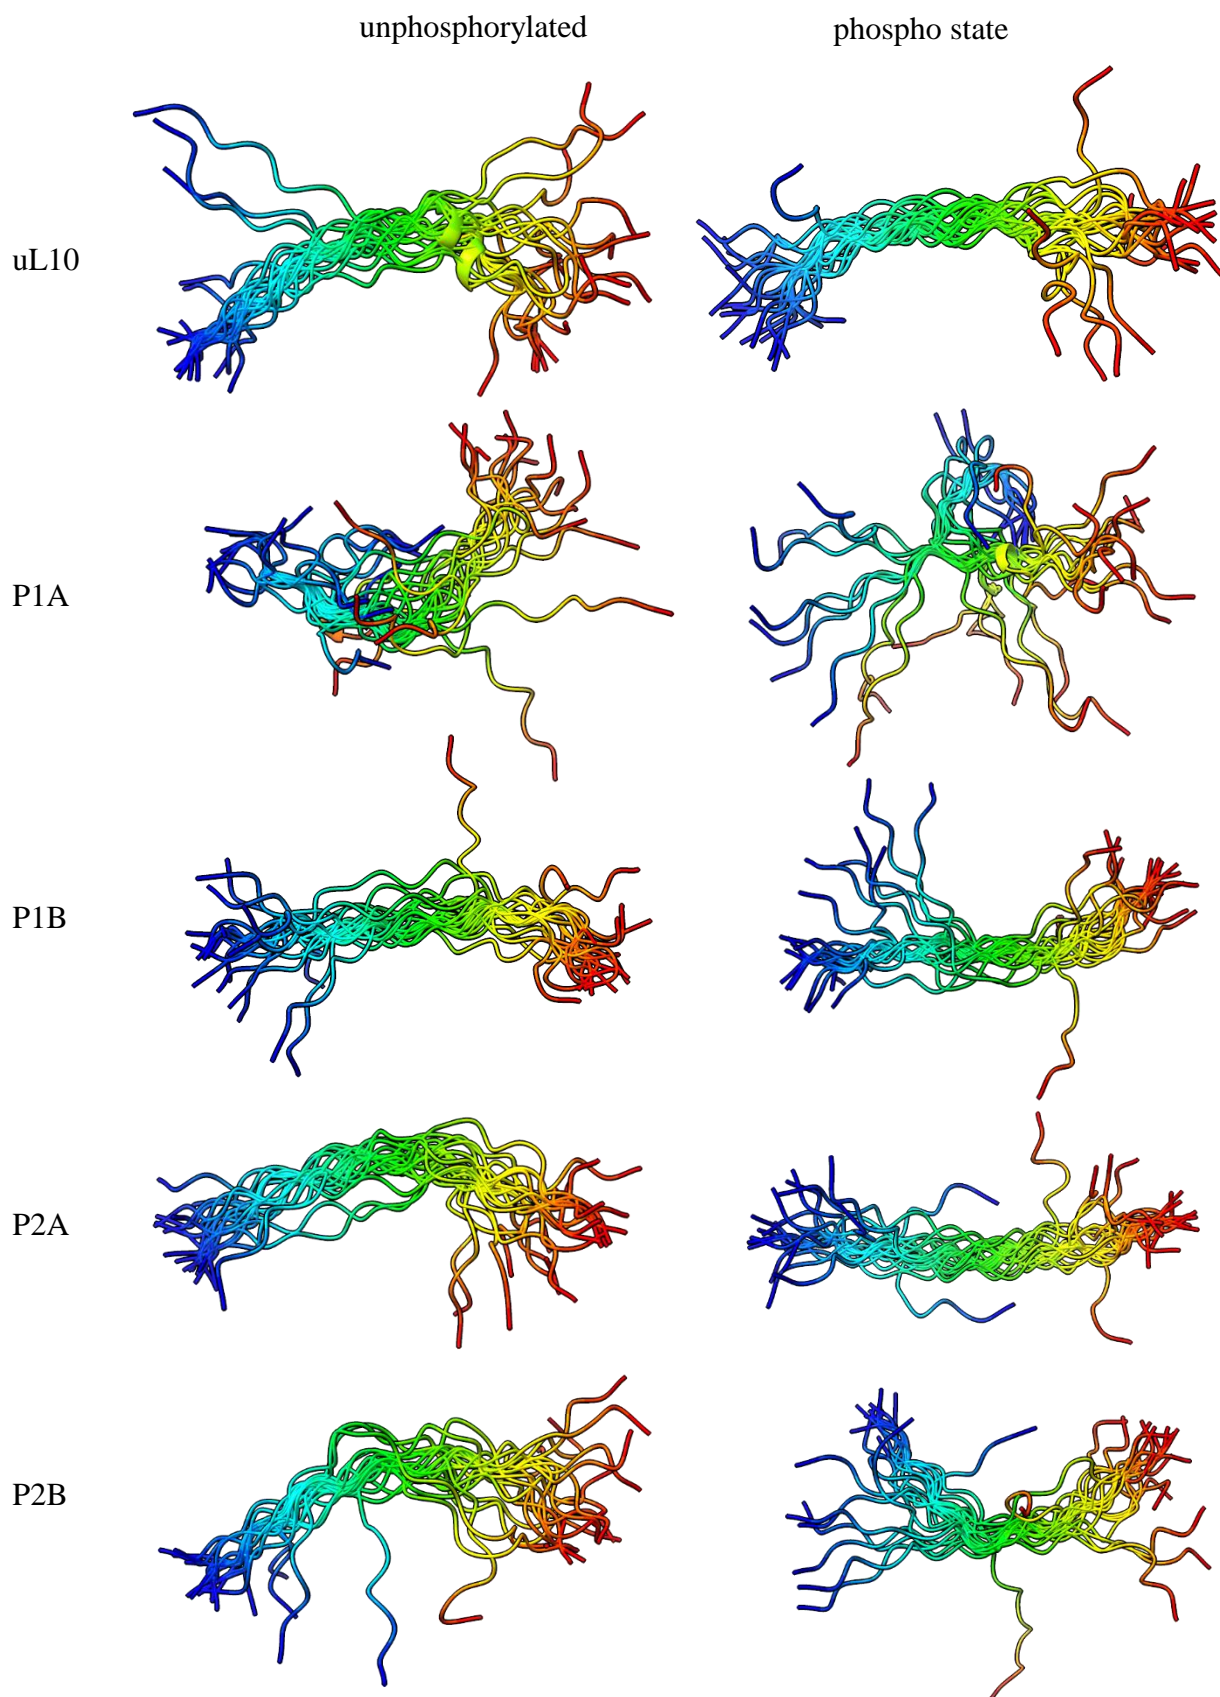

**Appendix Figure S7. MD simulation of ribosomal P-stalk CTDs belonging to yeast P-stalk proteins.** Representative structures of the most populated clusters from the MD simulations of the C-termini of yeast P-proteins (uL10, P1A, P1B, P2A and P2B) - wild-type (left side) and phospho-state (right side).<sup>10</sup>

# Appendix Figure. S8

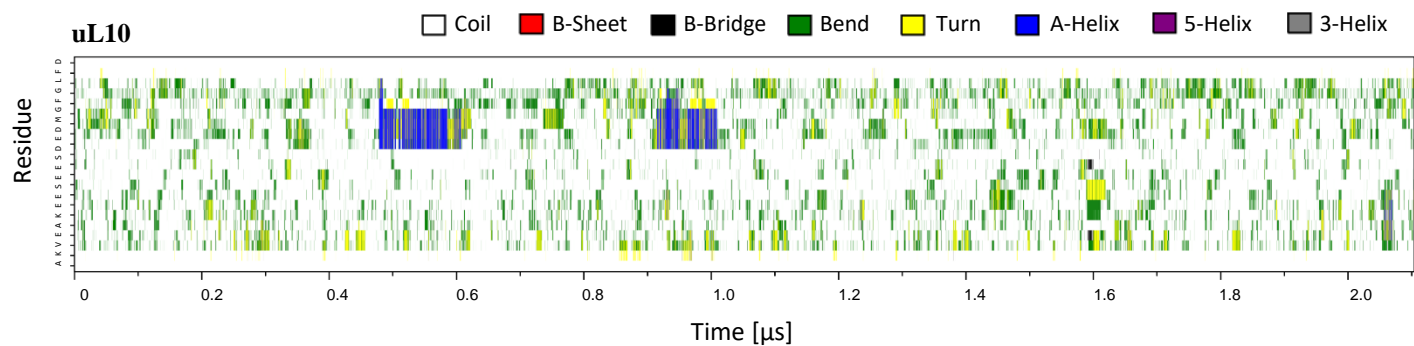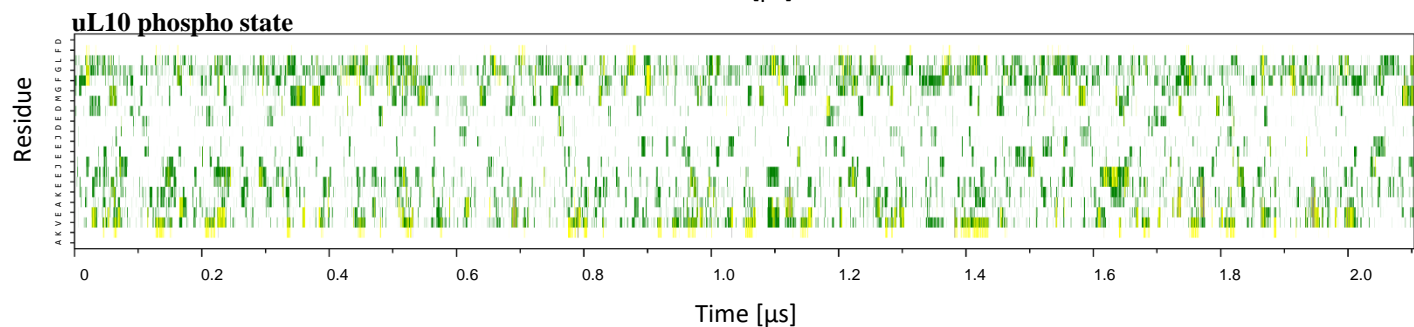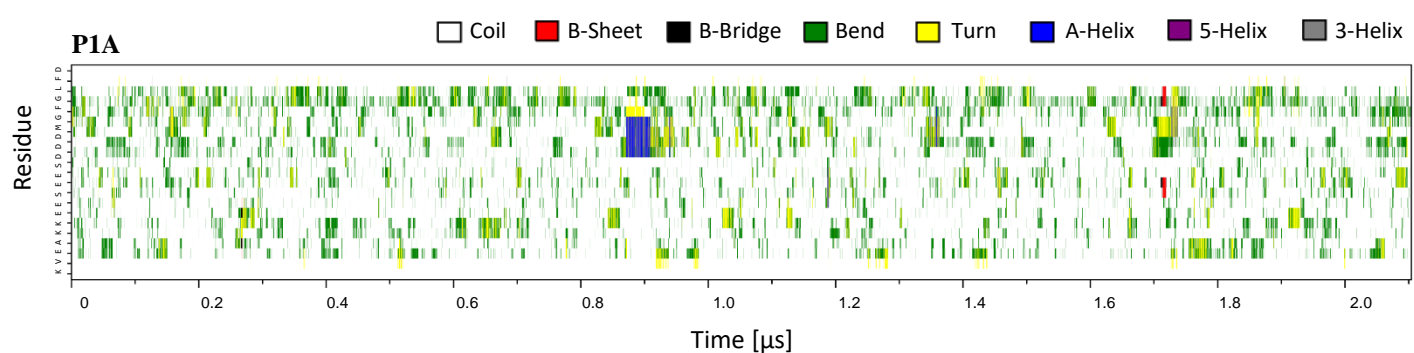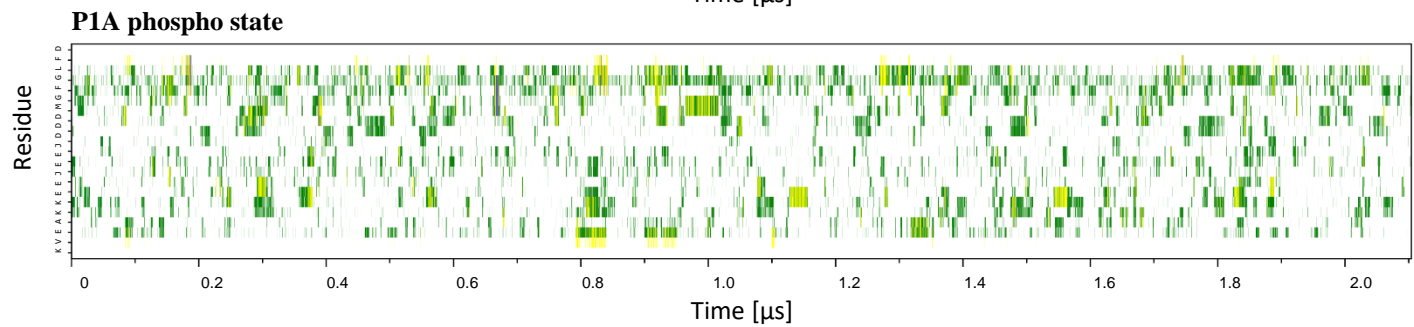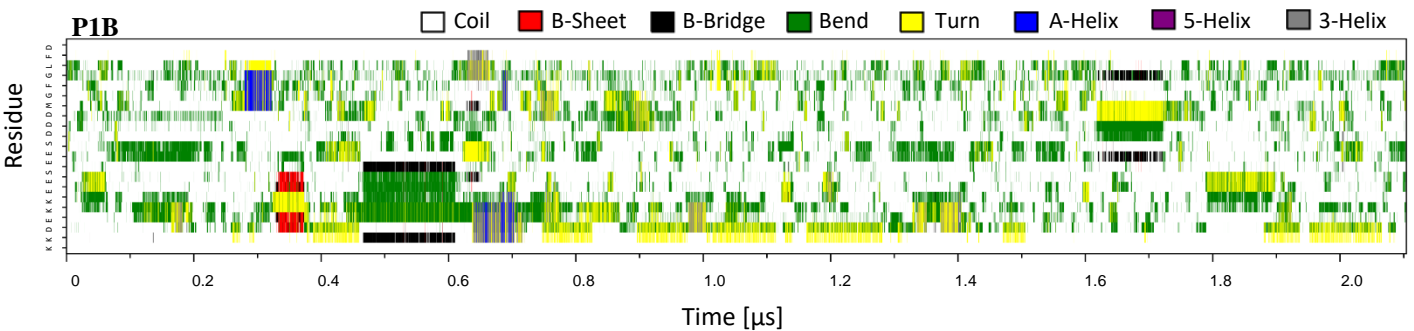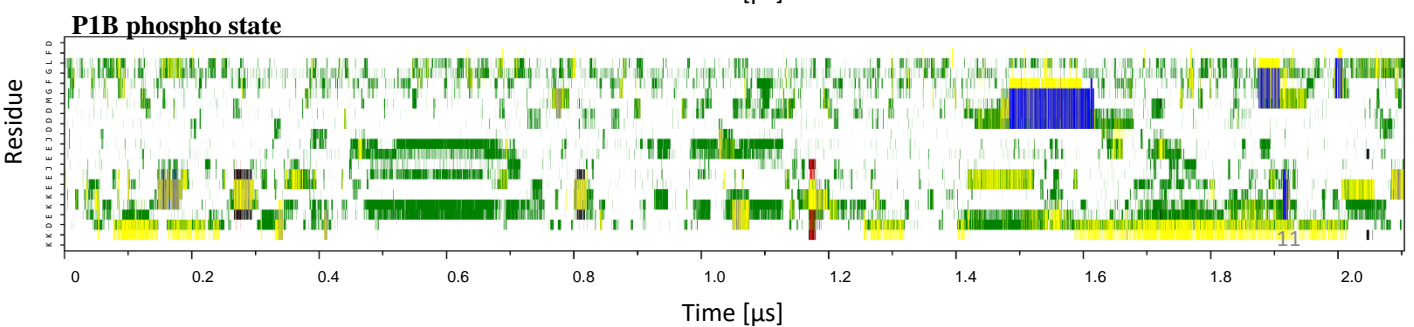

## Appendix Figure. S8

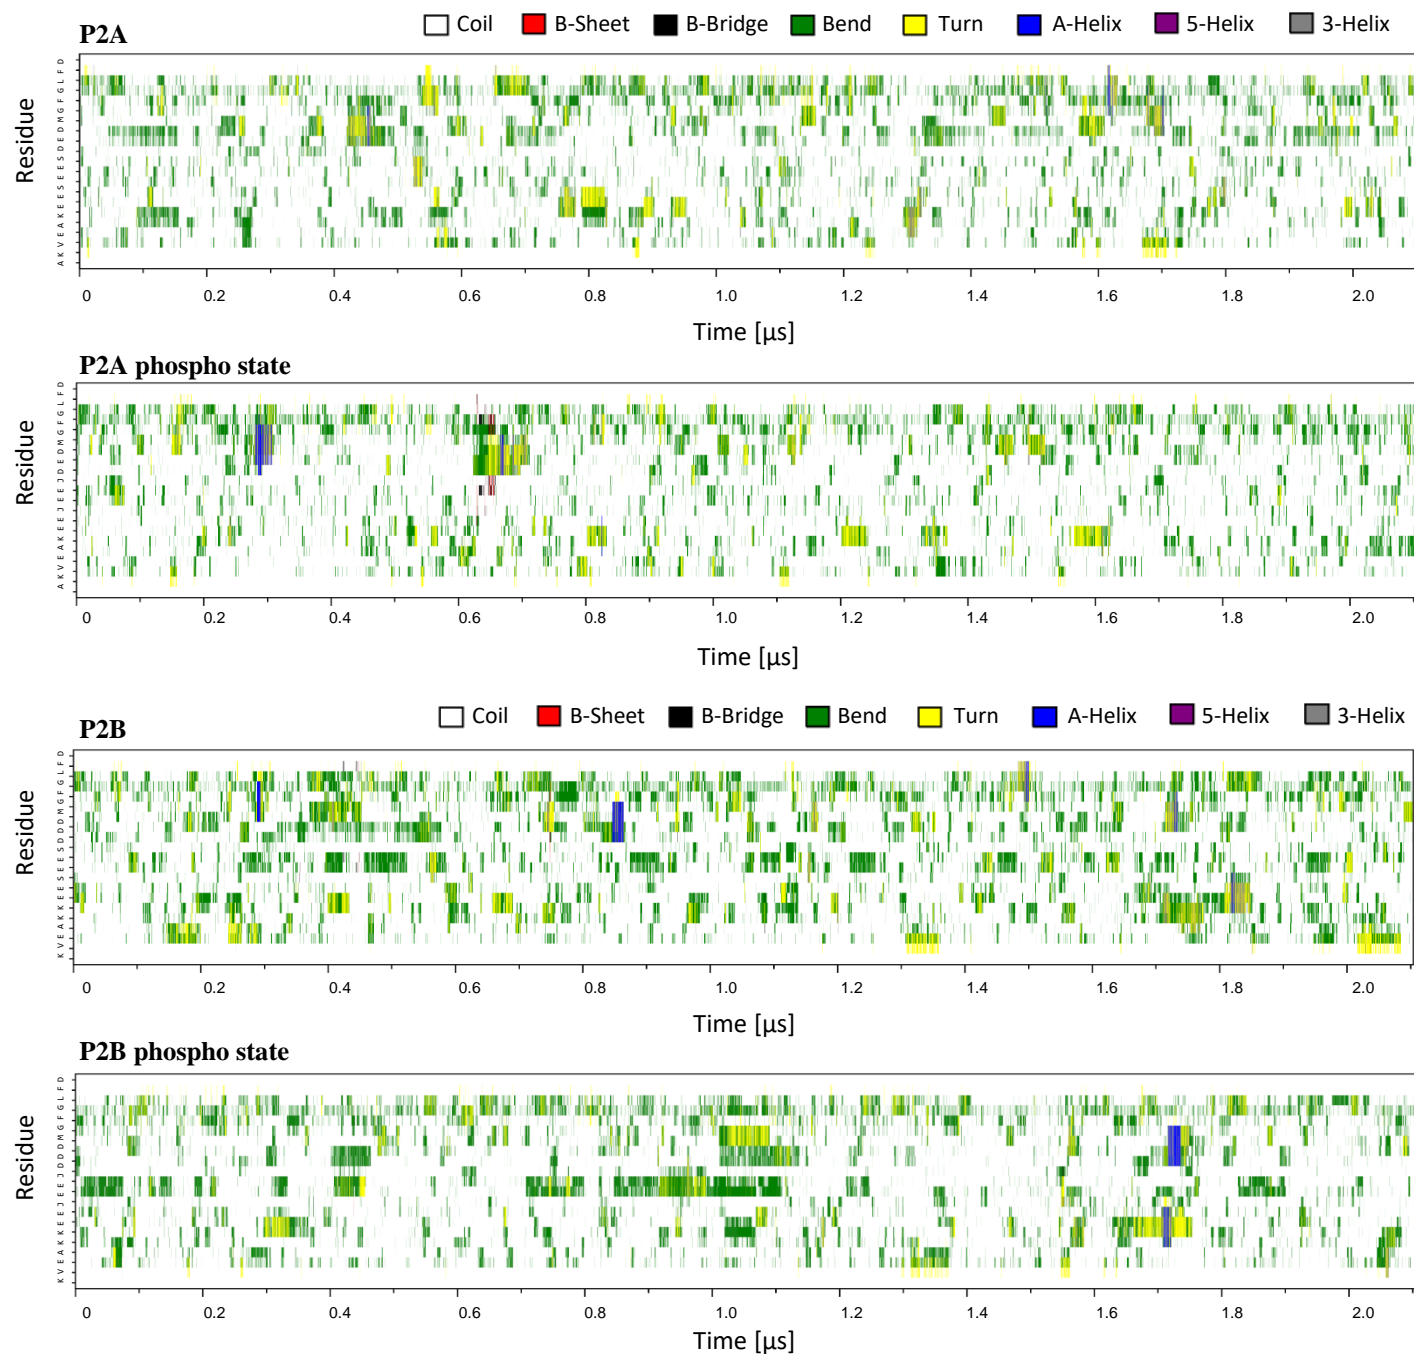

**Figure S8. MD simulation of the linear polypeptide chain.** The graph shows the occurrence of secondary structures versus time for the C-terminal peptides of the yeast P-proteins (uL10, P1A, P1B, P2A, P2B) folding for the unphosphorylated and phospho states. The structures have been coloured as indicated in the legend above. X - time of simulation, Y - position of individual amino acid residues.

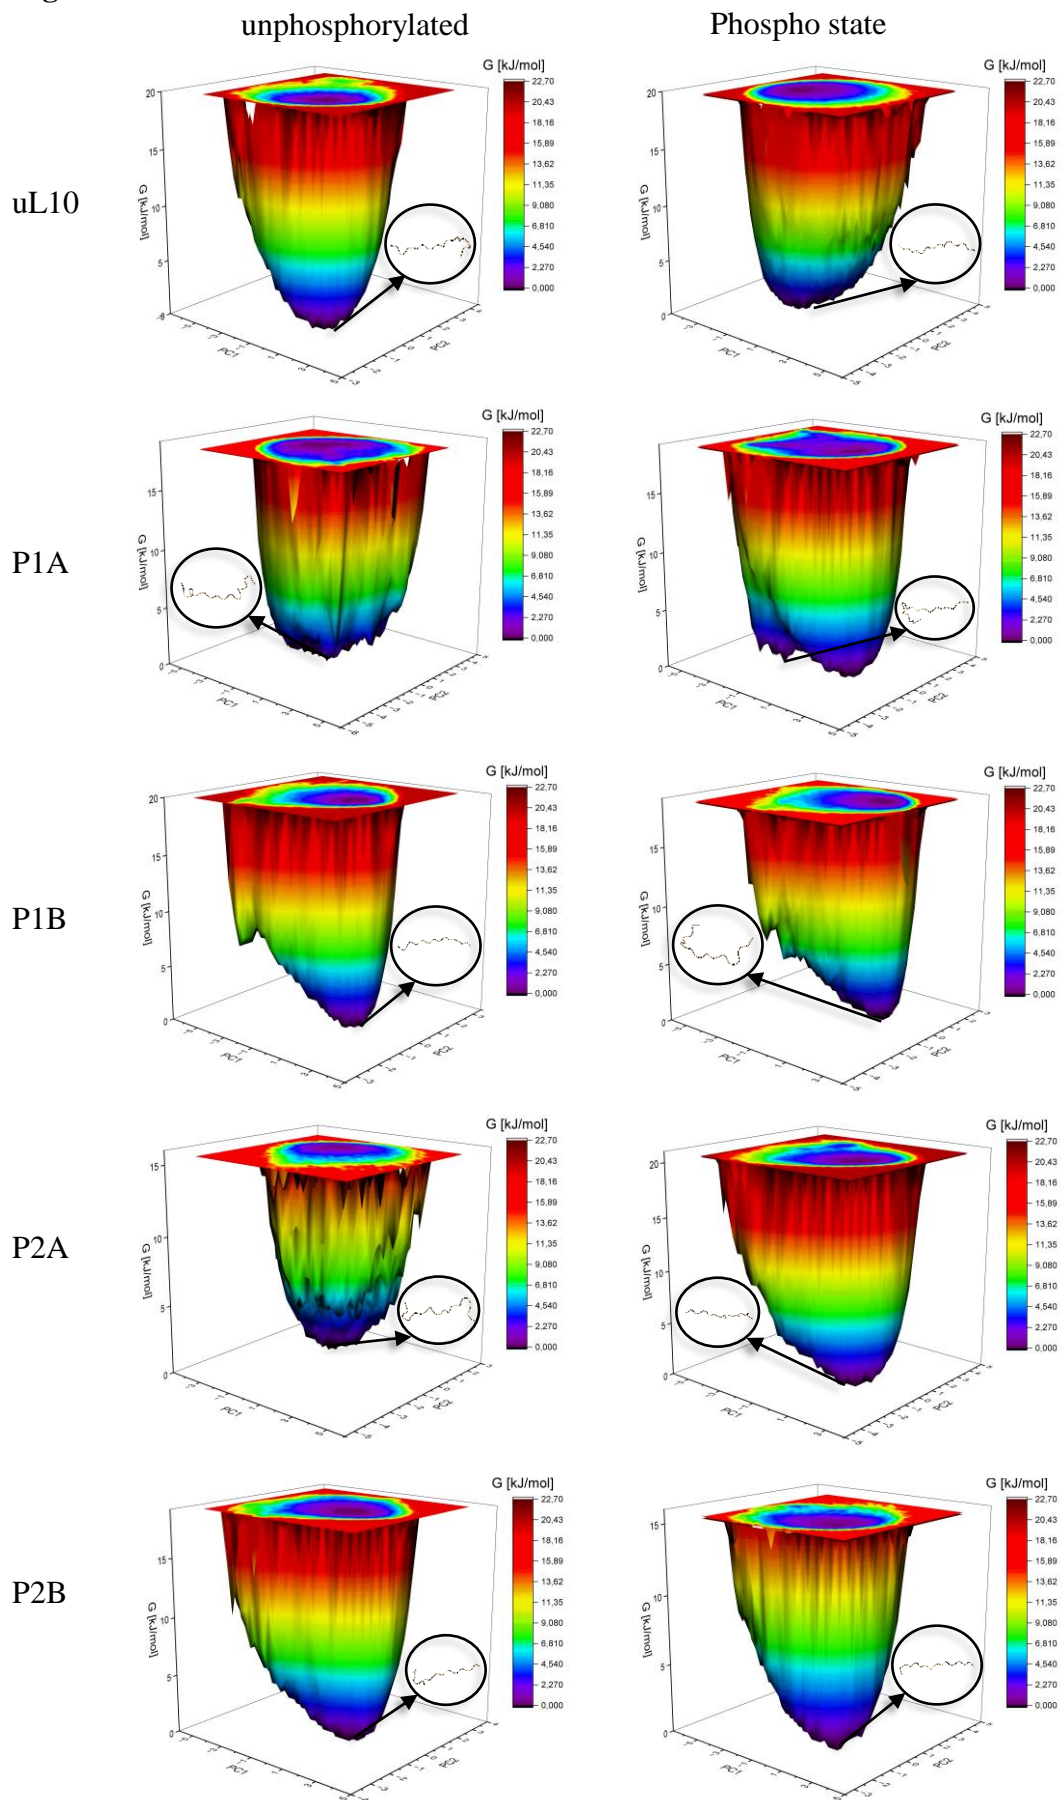

**Appendix Figure S9. Mapping of the free energy landscapes of the yeast P-proteins (uL10, P1A, P1B, P2A, P2B) C-terminal peptides. Wild type (left) and phospho state (right) from *S. cerevisiae*; inset - representative lowest-energy structures sampled during MD simulation.**

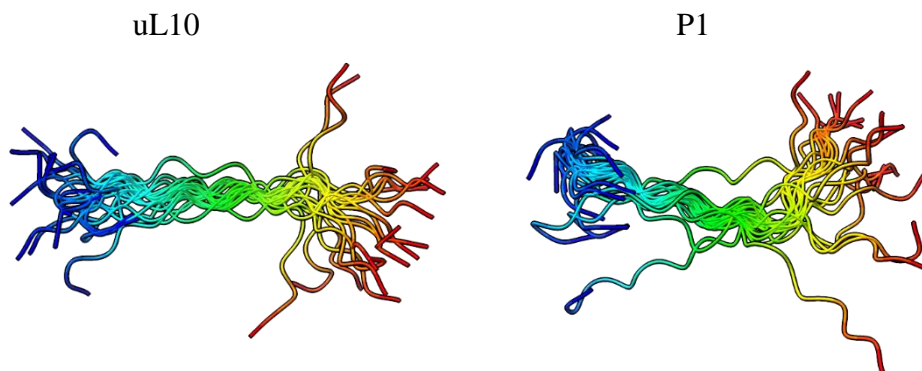

**Appendix Figure S10. MD simulation of archaeal ribosomal P-stalk CTDs.** Representative structures of the most populated clusters from the MD simulations of the C-termini of archaeal P proteins (uL10, P1). Rainbow colours represent the position of the amino acid within the analysed C-terminal polypeptide chain: N-terminal (blue) to C-terminal (red).

## Appendix Figure. S11

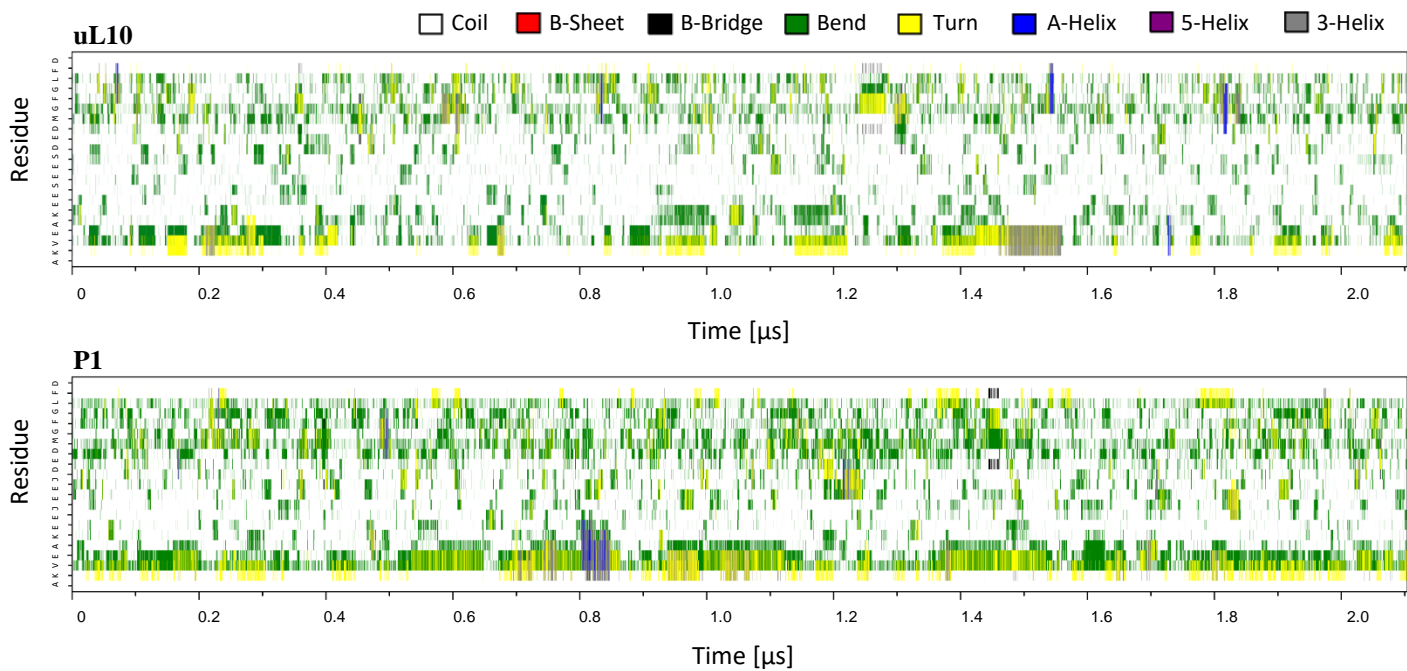

**Appendix Figure S11. MD simulation of linear polypeptide chains for Archea proteins.** The graph shows the occurrence of secondary structures versus time for the folding of the C-terminal peptides of the archaeal P-proteins (uL10, P1). The structures have been marked with individual colours as indicated in the legend above. X - time of simulation, Y - position of individual amino acid residues.

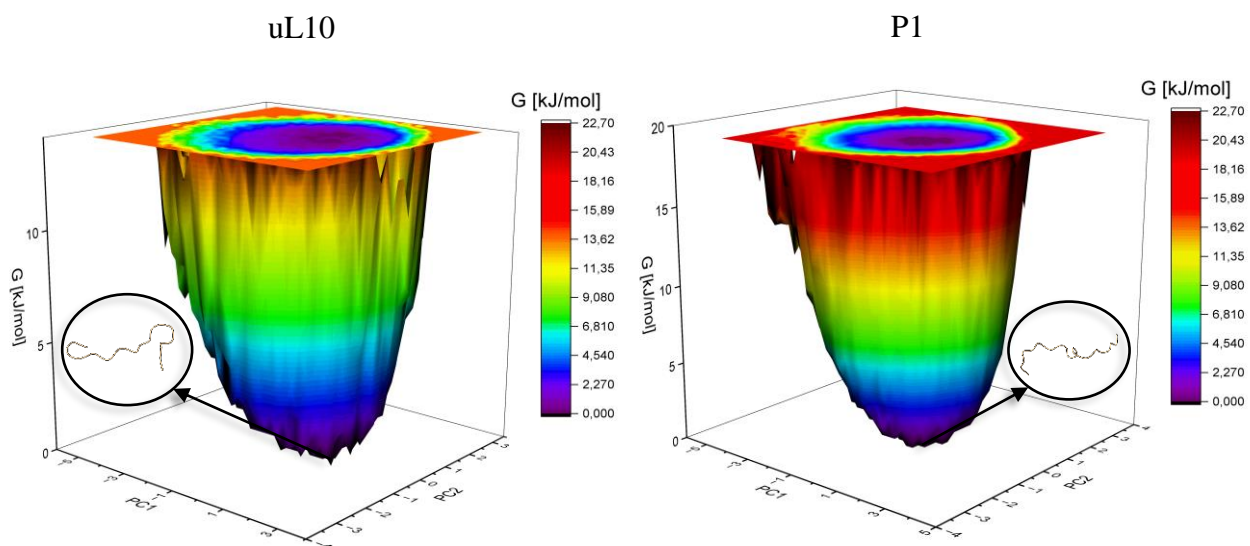

**Appendix Figure S12. Free energy landscape mapping of the C-terminal peptides of Archaea P-proteins (uL10, P1). Inset - representative lowest-energy structures sampled during MD simulation.**

# Appendix Figure. S13

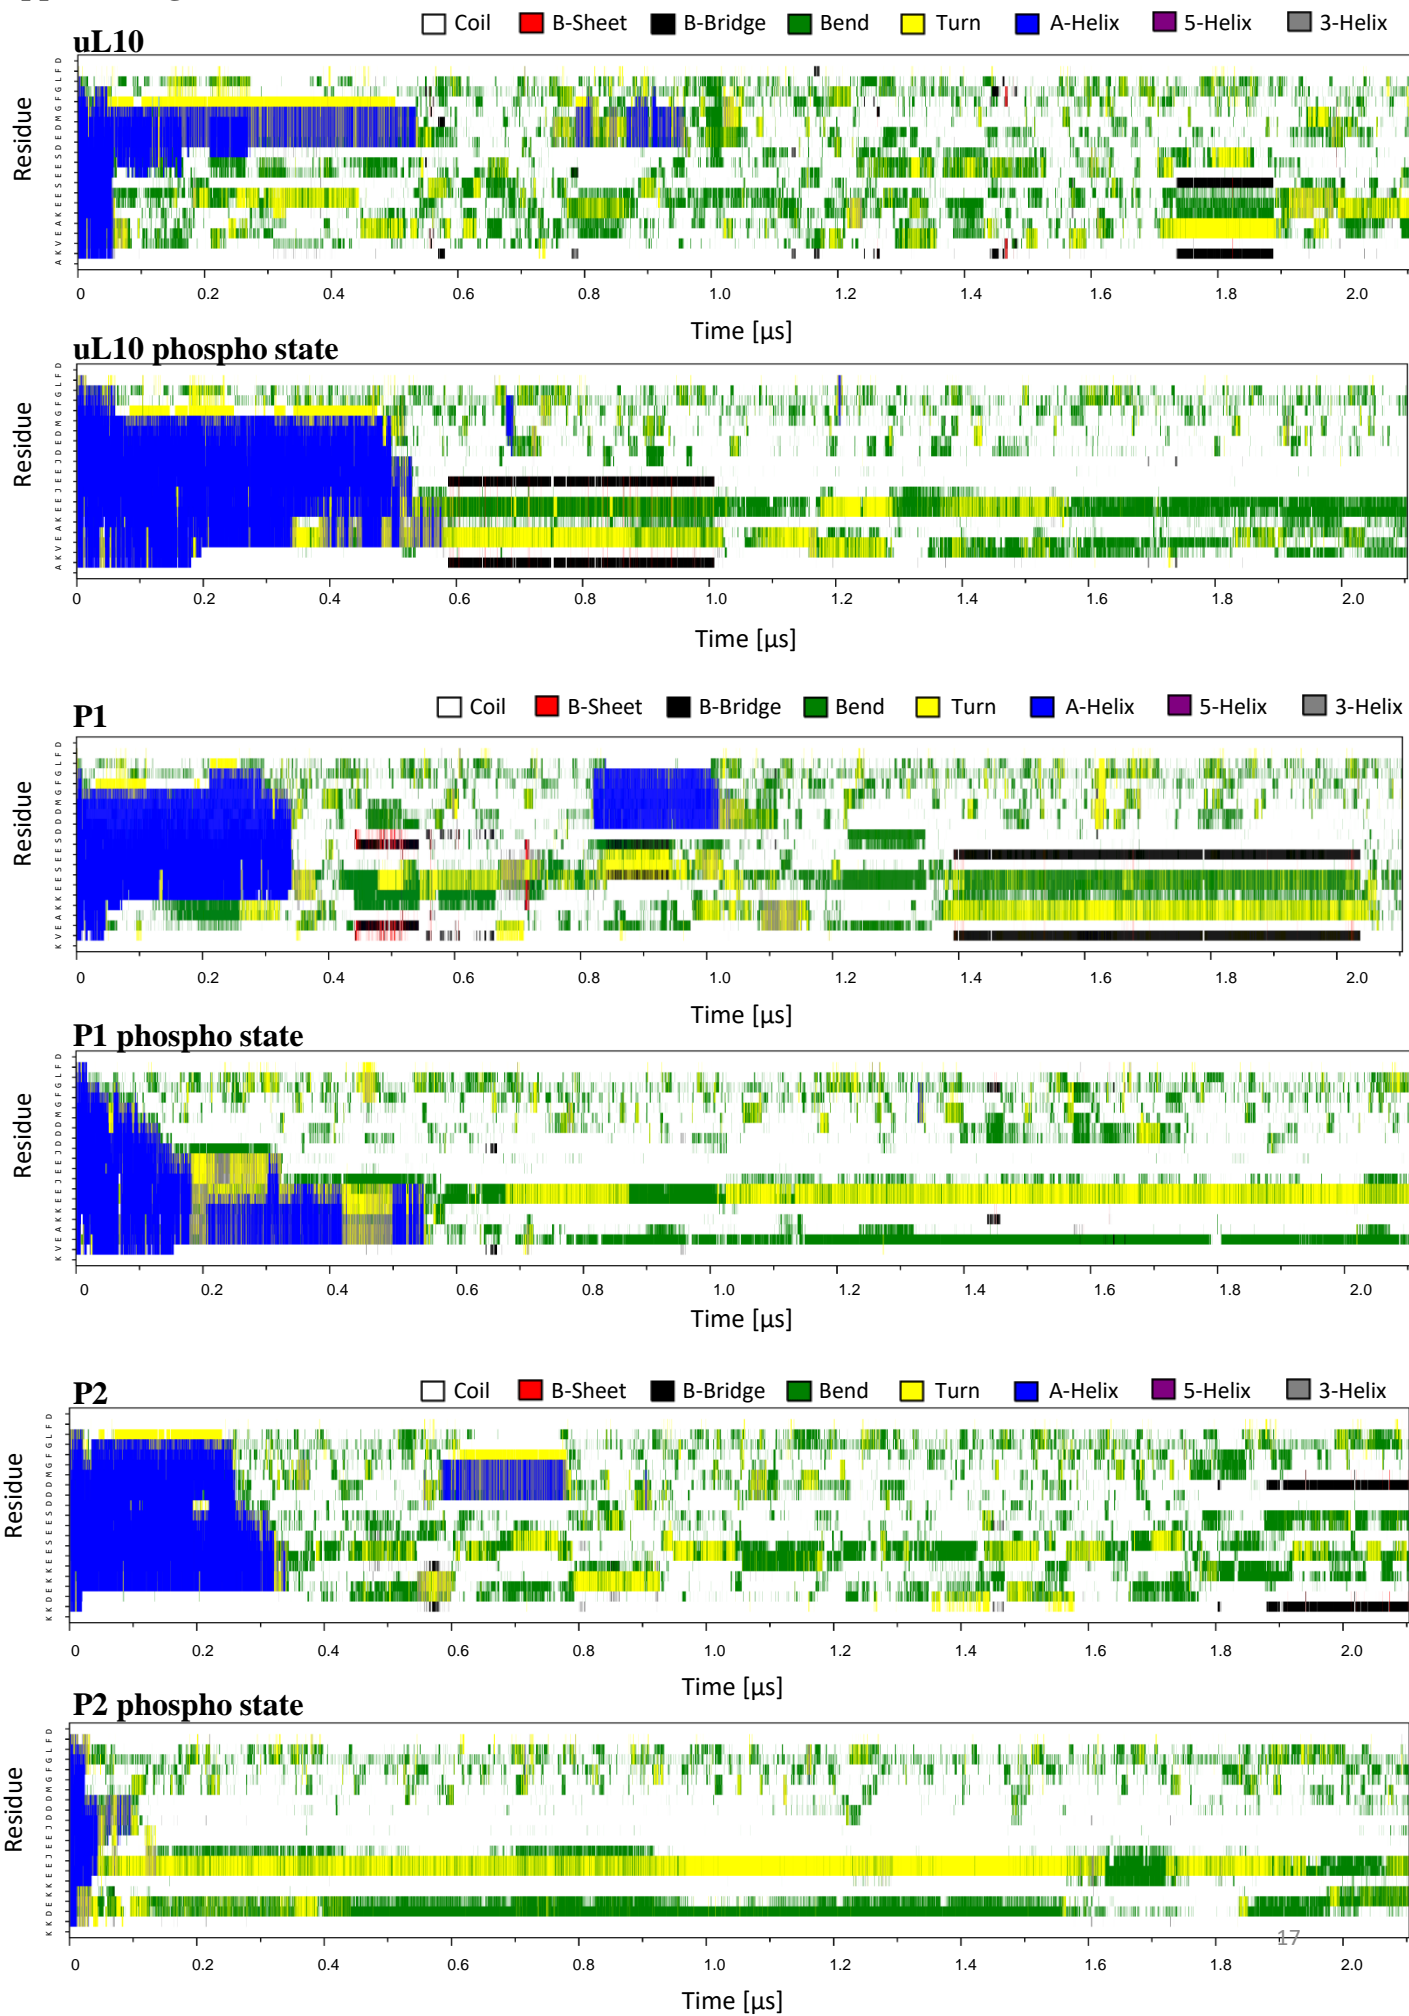

**Appendix Figure S13. MD simulation of  $\alpha$ -helix stability structures of the human P-proteins (uL10, P1, P2) C-termini peptides in dephospho and phospho state.** The structures were marked with individual colour as marked in the presented legend. On the X – time of simulation, Y – position of individual amino acid residues.

# Appendix Figure. S14

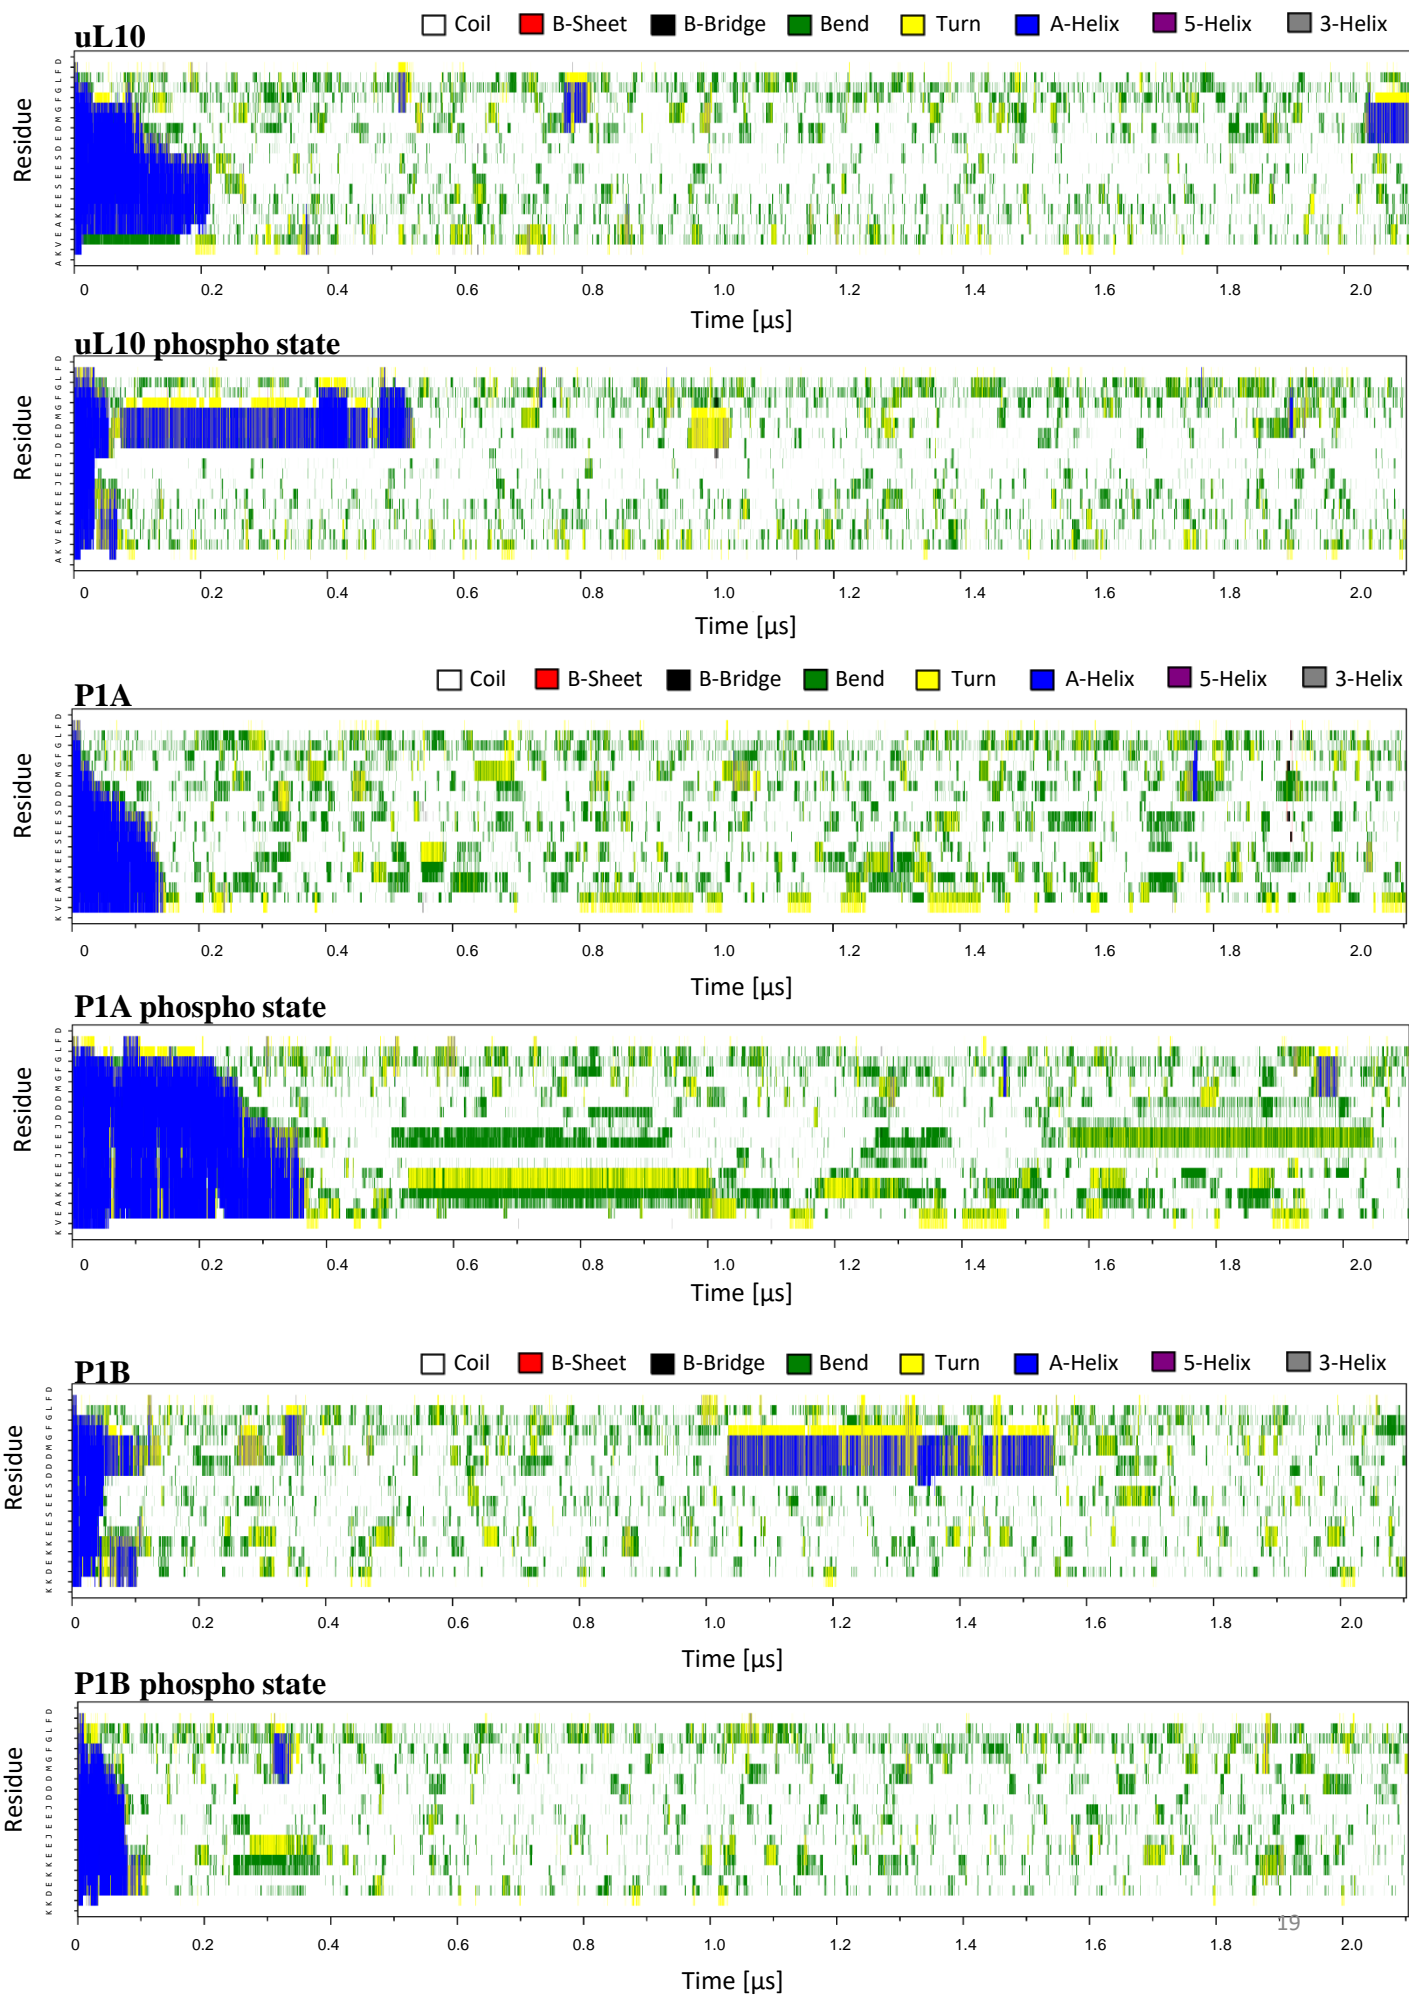

## Appendix Figure. S14

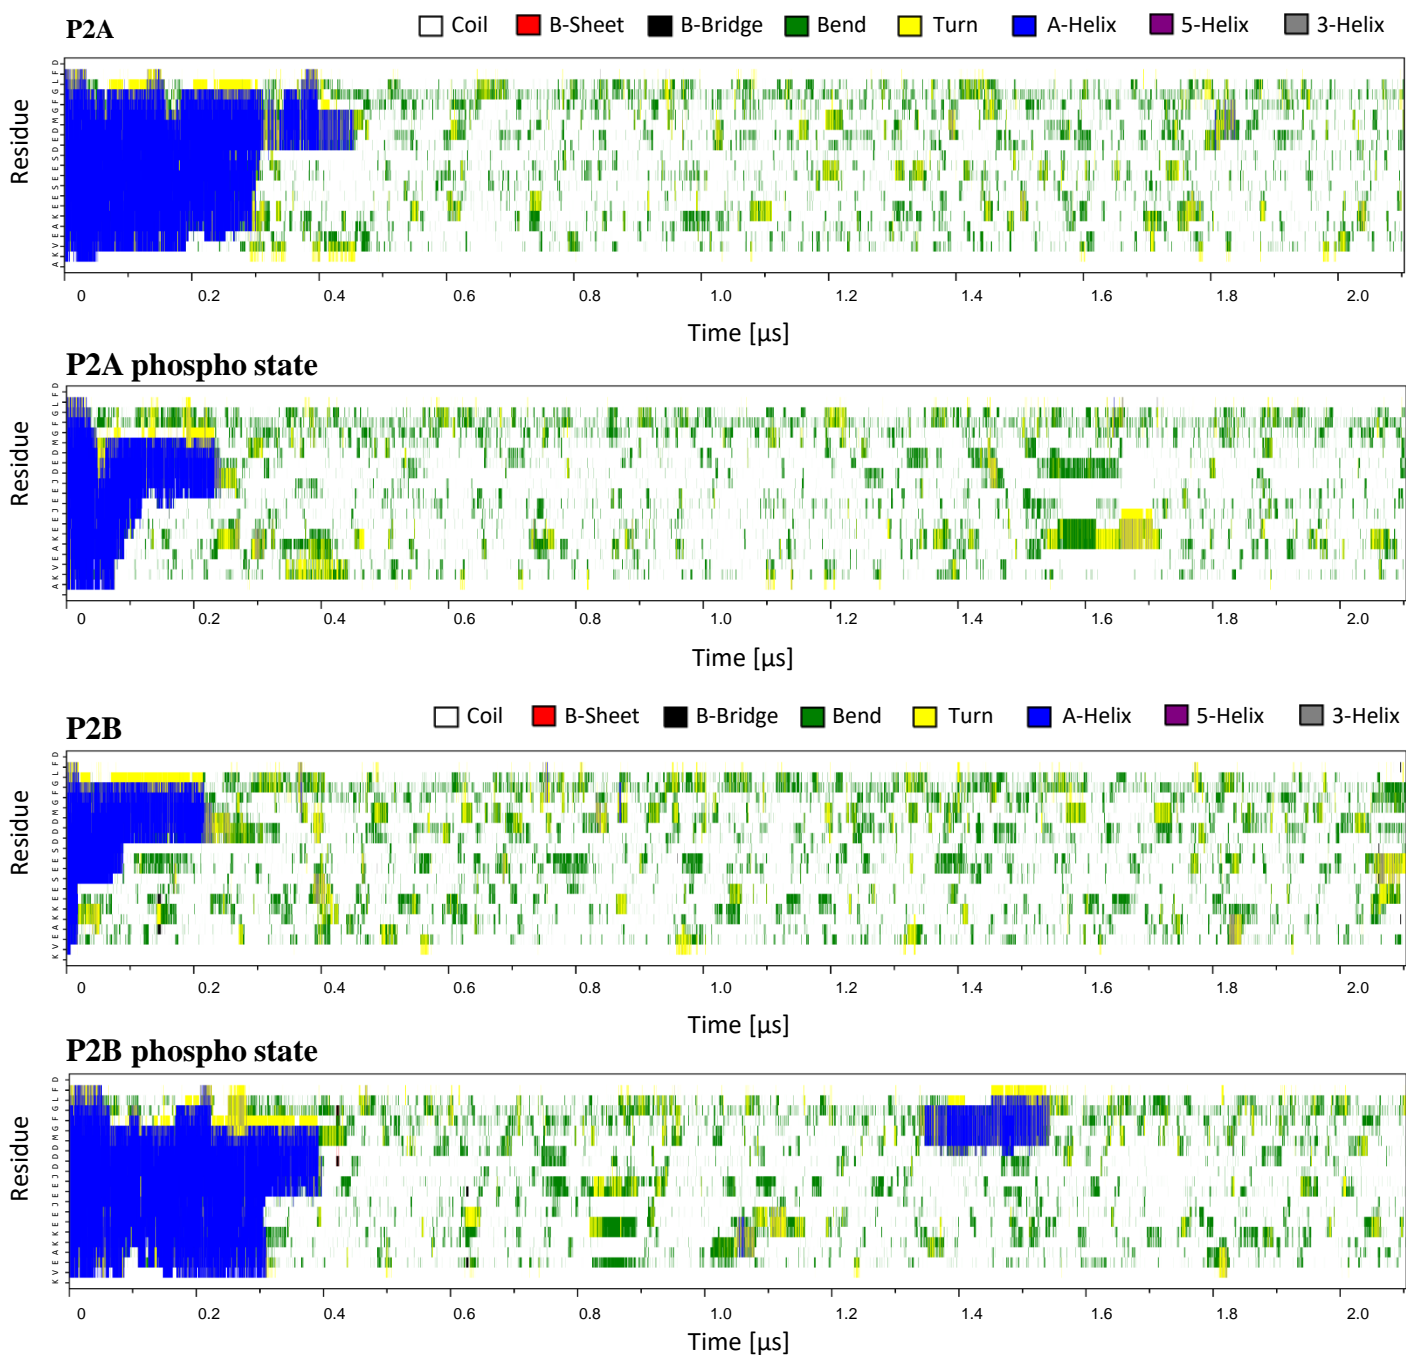

**Appendix Figure S14.** MD simulation of  $\alpha$ -helix stability structures of P-proteins from yeast (uL10, P1A, P1B, P2A, P2B) C-termini peptides in dephospho and phospho state; the structures were marked with individual color as marked in the presented legend. On the X – time of simulation, Y – position of individual amino acid residues.

## Appendix Figure. S15

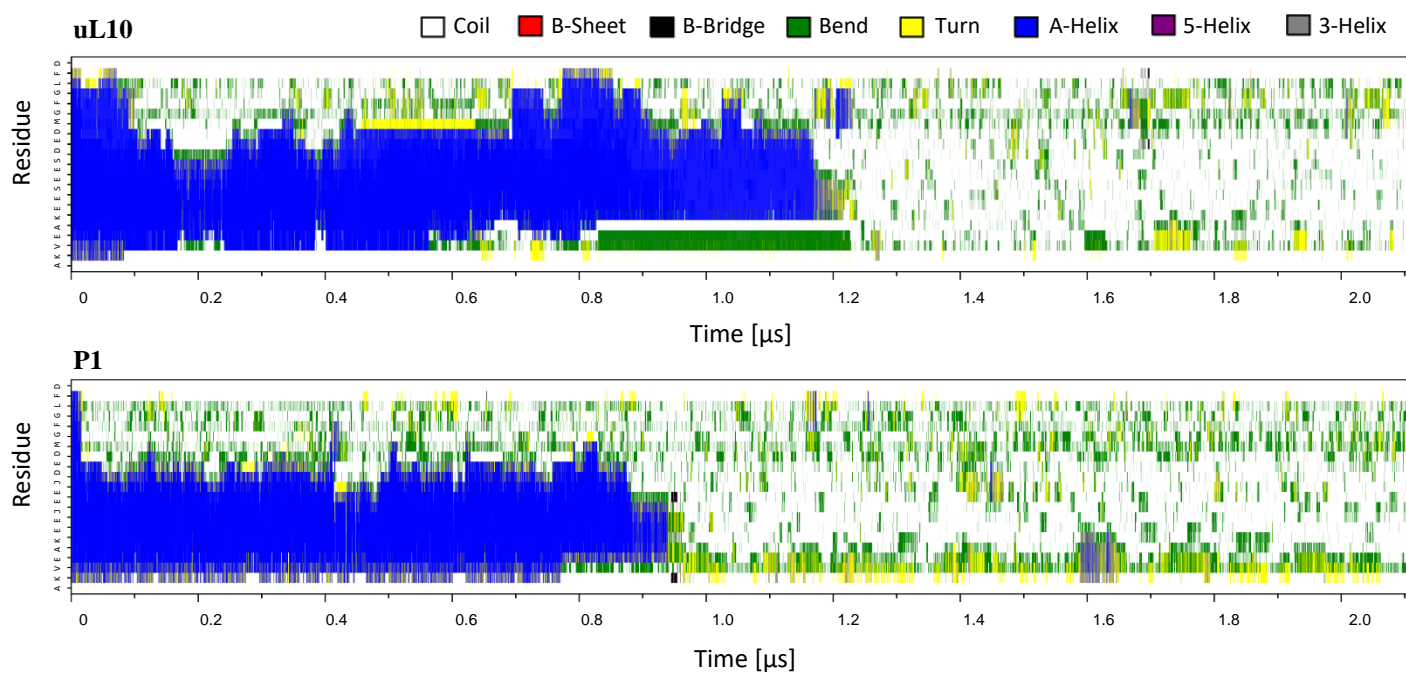

**Appendix Figure S15. MD simulation of  $\alpha$ -helix stability structures of P-proteins from Archaea (uL10, P1) C-termini peptides; the structures were marked with individual color as marked in the legend presented. On the X – time of simulation, Y – position of individual amino acid residues.**

# Appendix Figure. S16

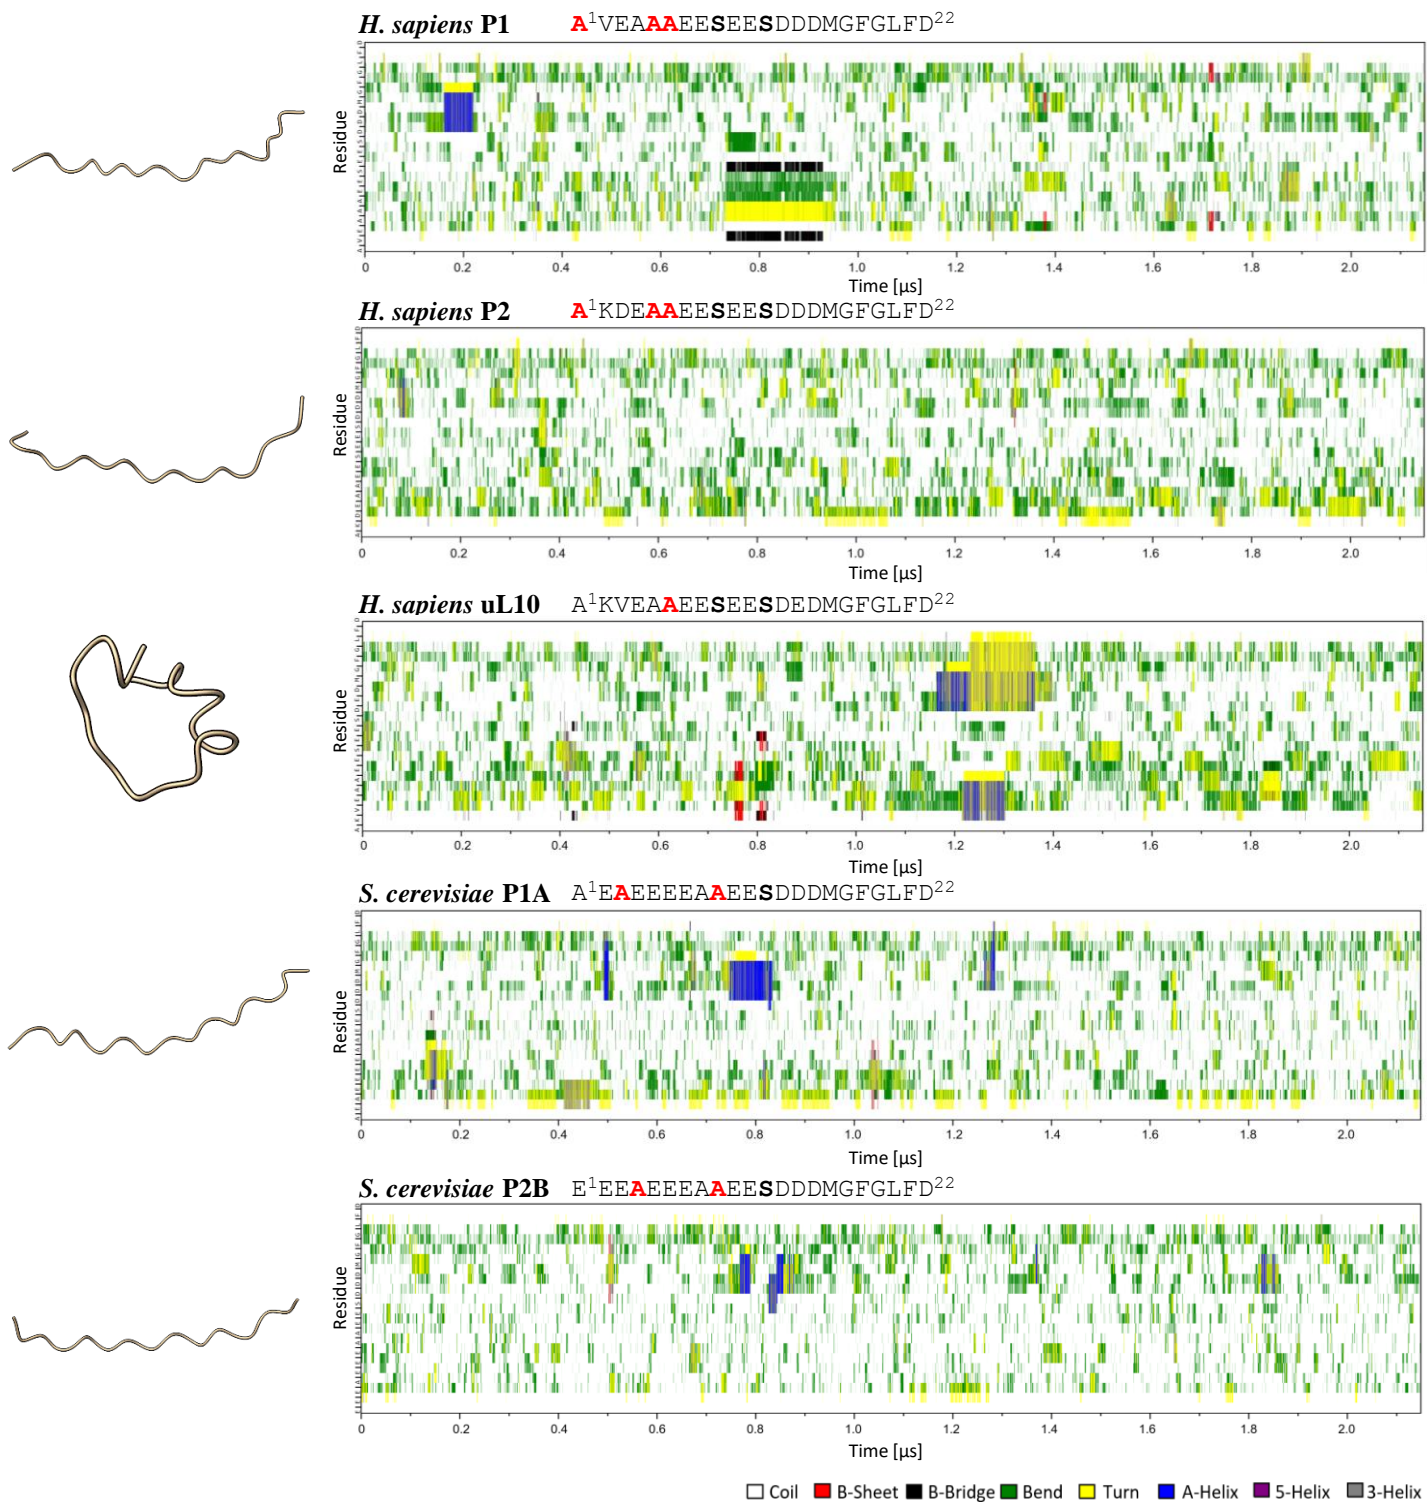

**Appendix Figure S16. MD simulations of lysine-to-alanine mutant forms of the P-stalk C-terminal peptides.** Left: the medoid structures of the most populated cluster for each MD simulation, identified using k-medoids clustering with a 3 Å cutoff, are shown. These medoid structures represent the central conformations of the major conformational states sampled during the simulations, highlighting the predominant structural motifs and variations within the mutant ensemble. Right: plots displaying the secondary structure evolution of the P-stalk proteins over the MD simulation time course, following the substitution of lysine residues with alanine. The plots show the structural stability and dynamics of the mutant peptides. Above, the amino acid sequences of the mutant peptides with alanine (in red) are shown, representing the substitution K to A.

# Appendix Table. S1

| Appendix Table S1. List of the proteins detected by mass spectrometry in WT (left) and SDPM (right) ribosomal samples. Proteins are sorted according to their numbering in the ribosomal nomenclature (60S and 40S). For each of the detected protein, theoretical molecular weight and length of protein are indicated. The mass spectrometry results are presented with the identification probability, exclusive unique spectrum counts and percentage of sequence coverage. |                                                                                                                  |               |                               |                                    |                                 |                              |                   |
|---------------------------------------------------------------------------------------------------------------------------------------------------------------------------------------------------------------------------------------------------------------------------------------------------------------------------------------------------------------------------------------------------------------------------------------------------------------------------------|------------------------------------------------------------------------------------------------------------------|---------------|-------------------------------|------------------------------------|---------------------------------|------------------------------|-------------------|
| Biological sample name                                                                                                                                                                                                                                                                                                                                                                                                                                                          | Protein name                                                                                                     | Alternate IDs | Protein molecular weight (Da) | Protein identification probability | Exclusive unique spectrum count | Percentage sequence coverage | Length (residues) |
| WT Ribosomes (BY4741)                                                                                                                                                                                                                                                                                                                                                                                                                                                           | 60S ribosomal protein L1-A OS= <i>Saccharomyces cerevisiae</i> (strain ATCC 204508 / S288c) GN=RPL1A PE=1 SV=1   | RPL1A,RPL1B   | 24 486,3                      | 100.00%                            | 25                              | 55.30%                       | 217               |
| WT Ribosomes (BY4741)                                                                                                                                                                                                                                                                                                                                                                                                                                                           | 60S ribosomal protein L2-A OS= <i>Saccharomyces cerevisiae</i> (strain ATCC 204508 / S288c) GN=RPL2A PE=1 SV=1   | RPL2A,RPL2B   | 27 408,9                      | 100.00%                            | 35                              | 66.90%                       | 254               |
| WT Ribosomes (BY4741)                                                                                                                                                                                                                                                                                                                                                                                                                                                           | 60S ribosomal protein L3 OS= <i>Saccharomyces cerevisiae</i> (strain ATCC 204508 / S288c) GN=RPL3 PE=1 SV=4      | RPL3          | 43 757,9                      | 100.00%                            | 55                              | 65.60%                       | 387               |
| WT Ribosomes (BY4741)                                                                                                                                                                                                                                                                                                                                                                                                                                                           | 60S ribosomal protein L4-A OS= <i>Saccharomyces cerevisiae</i> (strain ATCC 204508 / S288c) GN=RPL4A PE=1 SV=4   | RPL4A         | 39 092,0                      | 100.00%                            | 38                              | 65.20%                       | 362               |
| WT Ribosomes (BY4741)                                                                                                                                                                                                                                                                                                                                                                                                                                                           | 60S ribosomal protein L5 OS= <i>Saccharomyces cerevisiae</i> (strain ATCC 204508 / S288c) GN=RPL5 PE=1 SV=4      | RPL5          | 33 716,1                      | 100.00%                            | 23                              | 50.50%                       | 297               |
| WT Ribosomes (BY4741)                                                                                                                                                                                                                                                                                                                                                                                                                                                           | 60S ribosomal protein L6-A OS= <i>Saccharomyces cerevisiae</i> (strain ATCC 204508 / S288c) GN=RPL6A PE=1 SV=2   | RPL6A         | 19 962,1                      | 100.00%                            | 33                              | 78.40%                       | 176               |
| WT Ribosomes (BY4741)                                                                                                                                                                                                                                                                                                                                                                                                                                                           | 60S ribosomal protein L6-B OS= <i>Saccharomyces cerevisiae</i> (strain ATCC 204508 / S288c) GN=RPL6B PE=1 SV=4   | RPL6B         | 19 986,9                      | 100.00%                            | 11                              | 77.30%                       | 176               |
| WT Ribosomes (BY4741)                                                                                                                                                                                                                                                                                                                                                                                                                                                           | 60S ribosomal protein L7-B OS= <i>Saccharomyces cerevisiae</i> (strain ATCC 204508 / S288c) GN=RPL7B PE=1 SV=3   | RPL7B         | 27 697,8                      | 100.00%                            | 25                              | 52.90%                       | 244               |
| WT Ribosomes (BY4741)                                                                                                                                                                                                                                                                                                                                                                                                                                                           | 60S ribosomal protein L8-B OS= <i>Saccharomyces cerevisiae</i> (strain ATCC 204508 / S288c) GN=RPL8B PE=1 SV=3   | RPL8B         | 28 112,8                      | 100.00%                            | 39                              | 71.90%                       | 256               |
| WT Ribosomes (BY4741)                                                                                                                                                                                                                                                                                                                                                                                                                                                           | 60S ribosomal protein L8-A OS= <i>Saccharomyces cerevisiae</i> (strain ATCC 204508 / S288c) GN=RPL8A PE=1 SV=4   | RPL8A         | 28 125,5                      | 100.00%                            | 6                               | 67.60%                       | 256               |
| WT Ribosomes (BY4741)                                                                                                                                                                                                                                                                                                                                                                                                                                                           | 60S ribosomal protein L9-A OS= <i>Saccharomyces cerevisiae</i> (strain ATCC 204508 / S288c) GN=RPL9A PE=1 SV=2   | RPL9A         | 21 568,8                      | 100.00%                            | 20                              | 55.00%                       | 191               |
| WT Ribosomes (BY4741)                                                                                                                                                                                                                                                                                                                                                                                                                                                           | 60S ribosomal protein L10 OS= <i>Saccharomyces cerevisiae</i> (strain ATCC 204508 / S288c) GN=RPL10 PE=1 SV=1    | RPL10         | 25 362,1                      | 100.00%                            | 35                              | 72.90%                       | 221               |
| WT Ribosomes (BY4741)                                                                                                                                                                                                                                                                                                                                                                                                                                                           | 60S ribosomal protein L11-A OS= <i>Saccharomyces cerevisiae</i> (strain ATCC 204508 / S288c) GN=RPL11A PE=1 SV=2 | RPL11A,RPL11B | 19 750,0                      | 100.00%                            | 13                              | 39.70%                       | 174               |
| WT Ribosomes (BY4741)                                                                                                                                                                                                                                                                                                                                                                                                                                                           | 60S ribosomal protein L12-A OS= <i>Saccharomyces cerevisiae</i> (strain ATCC 204508 / S288c) GN=RPL12A PE=1 SV=1 | RPL12A,RPL12B | 17 823,2                      | 100.00%                            | 17                              | 77.00%                       | 165               |
| WT Ribosomes (BY4741)                                                                                                                                                                                                                                                                                                                                                                                                                                                           | 60S ribosomal protein L13-A OS= <i>Saccharomyces cerevisiae</i> (strain ATCC 204508 / S288c) GN=RPL13A PE=1 SV=1 | RPL13A        | 22 554,5                      | 100.00%                            | 29                              | 61.30%                       | 199               |
| WT Ribosomes (BY4741)                                                                                                                                                                                                                                                                                                                                                                                                                                                           | 60S ribosomal protein L14-A OS= <i>Saccharomyces cerevisiae</i> (strain ATCC 204508 / S288c) GN=RPL14A PE=1 SV=1 | RPL14A        | 15 167,2                      | 100.00%                            | 24                              | 66.70%                       | 138               |
| WT Ribosomes (BY4741)                                                                                                                                                                                                                                                                                                                                                                                                                                                           | 60S ribosomal protein L14-B OS= <i>Saccharomyces cerevisiae</i> (strain ATCC 204508 / S288c) GN=RPL14B PE=1 SV=1 | RPL14B        | 15 153,2                      | 100.00%                            | 2                               | 65.90%                       | 138               |
| WT Ribosomes (BY4741)                                                                                                                                                                                                                                                                                                                                                                                                                                                           | 60S ribosomal protein L15-A OS= <i>Saccharomyces cerevisiae</i> (strain ATCC 204508 / S288c) GN=RPL15A PE=1 SV=3 | RPL15A        | 24 422,6                      | 100.00%                            | 18                              | 52.50%                       | 204               |
| WT Ribosomes (BY4741)                                                                                                                                                                                                                                                                                                                                                                                                                                                           | 60S ribosomal protein L16-B OS= <i>Saccharomyces cerevisiae</i> (strain ATCC 204508 / S288c) GN=RPL16B PE=1 SV=3 | RPL16B        | 22 249,9                      | 100.00%                            | 17                              | 56.10%                       | 198               |
| WT Ribosomes (BY4741)                                                                                                                                                                                                                                                                                                                                                                                                                                                           | 60S ribosomal protein L16-A OS= <i>Saccharomyces cerevisiae</i> (strain ATCC 204508 / S288c) GN=RPL16A PE=1 SV=3 | RPL16A        | 22 201,6                      | 100.00%                            | 30                              | 57.30%                       | 199               |
| WT Ribosomes (BY4741)                                                                                                                                                                                                                                                                                                                                                                                                                                                           | 60S ribosomal protein L17-B OS= <i>Saccharomyces cerevisiae</i> (strain ATCC 204508 / S288c) GN=RPL17B PE=1 SV=2 | RPL17B        | 20 551,6                      | 100.00%                            | 27                              | 65.20%                       | 184               |
| WT Ribosomes (BY4741)                                                                                                                                                                                                                                                                                                                                                                                                                                                           | 60S ribosomal protein L18-A OS= <i>Saccharomyces cerevisiae</i> (strain ATCC 204508 / S288c) GN=RPL18A PE=1 SV=1 | RPL18A,RPL18B | 20 563,7                      | 100.00%                            | 15                              | 48.40%                       | 186               |
| WT Ribosomes (BY4741)                                                                                                                                                                                                                                                                                                                                                                                                                                                           | 60S ribosomal protein L19-A OS= <i>Saccharomyces cerevisiae</i> (strain ATCC 204508 / S288c) GN=RPL19A PE=1 SV=1 | RPL19A,RPL19B | 21 704,6                      | 100.00%                            | 30                              | 52.40%                       | 189               |
| WT Ribosomes (BY4741)                                                                                                                                                                                                                                                                                                                                                                                                                                                           | 60S ribosomal protein L20-A OS= <i>Saccharomyces cerevisiae</i> (strain ATCC 204508 / S288c) GN=RPL20A PE=1 SV=1 | RPL20A,RPL20B | 20 437,1                      | 100.00%                            | 29                              | 73.80%                       | 172               |
| WT Ribosomes (BY4741)                                                                                                                                                                                                                                                                                                                                                                                                                                                           | 60S ribosomal protein L21-A OS= <i>Saccharomyces cerevisiae</i> (strain ATCC 204508 / S288c) GN=RPL21A PE=1 SV=1 | RPL21A        | 18 242,0                      | 100.00%                            | 24                              | 72.50%                       | 160               |
| WT Ribosomes (BY4741)                                                                                                                                                                                                                                                                                                                                                                                                                                                           | 60S ribosomal protein L22-A OS= <i>Saccharomyces cerevisiae</i> (strain ATCC 204508 / S288c) GN=RPL22A PE=1 SV=3 | RPL22A        | 13 693,4                      | 100.00%                            | 5                               | 54.50%                       | 121               |
| WT Ribosomes (BY4741)                                                                                                                                                                                                                                                                                                                                                                                                                                                           | 60S ribosomal protein L23-A OS= <i>Saccharomyces cerevisiae</i> (strain ATCC 204508 / S288c) GN=RPL23A PE=1 SV=1 | RPL23A,RPL23B | 14 473,1                      | 100.00%                            | 17                              | 56.20%                       | 137               |
| WT Ribosomes (BY4741)                                                                                                                                                                                                                                                                                                                                                                                                                                                           | 60S ribosomal protein L24-A OS= <i>Saccharomyces cerevisiae</i> (strain ATCC 204508 / S288c) GN=RPL24A PE=1 SV=1 | RPL24A        | 17 614,4                      | 100.00%                            | 17                              | 42.60%                       | 155               |
| WT Ribosomes (BY4741)                                                                                                                                                                                                                                                                                                                                                                                                                                                           | 60S ribosomal protein L25 OS= <i>Saccharomyces cerevisiae</i> (strain ATCC 204508 / S288c) GN=RPL25 PE=1 SV=4    | RPL25         | 15 758,2                      | 100.00%                            | 20                              | 67.60%                       | 142               |
| WT Ribosomes (BY4741)                                                                                                                                                                                                                                                                                                                                                                                                                                                           | 60S ribosomal protein L26-A OS= <i>Saccharomyces cerevisiae</i> (strain ATCC 204508 / S288c) GN=RPL26A PE=1 SV=3 | RPL26A        | 14 234,3                      | 100.00%                            | 4                               | 69.30%                       | 127               |
| WT Ribosomes (BY4741)                                                                                                                                                                                                                                                                                                                                                                                                                                                           | 60S ribosomal protein L26-B OS= <i>Saccharomyces cerevisiae</i> (strain ATCC 204508 / S288c) GN=RPL26B PE=1 SV=2 | RPL26B        | 14 235,3                      | 100.00%                            | 33                              | 69.30%                       | 127               |
| WT Ribosomes (BY4741)                                                                                                                                                                                                                                                                                                                                                                                                                                                           | 60S ribosomal protein L27-A OS= <i>Saccharomyces cerevisiae</i> (strain ATCC 204508 / S288c) GN=RPL27A PE=1 SV=1 | RPL27A        | 15 531,2                      | 100.00%                            | 30                              | 70.60%                       | 136               |
| WT Ribosomes (BY4741)                                                                                                                                                                                                                                                                                                                                                                                                                                                           | 60S ribosomal protein L28 OS= <i>Saccharomyces cerevisiae</i> (strain ATCC 204508 / S288c) GN=RPL28 PE=1 SV=3    | RPL28         | 16 721,9                      | 100.00%                            | 12                              | 38.30%                       | 149               |
| WT Ribosomes (BY4741)                                                                                                                                                                                                                                                                                                                                                                                                                                                           | 60S ribosomal protein L30 OS= <i>Saccharomyces cerevisiae</i> (strain ATCC 204508 / S288c) GN=RPL30 PE=1 SV=3    | RPL30         | 11 416,0                      | 100.00%                            | 25                              | 78.10%                       | 105               |
| WT Ribosomes (BY4741)                                                                                                                                                                                                                                                                                                                                                                                                                                                           | 60S ribosomal protein L31-A OS= <i>Saccharomyces cerevisiae</i> (strain ATCC 204508 / S288c) GN=RPL31A PE=1 SV=1 | RPL31A        | 12 953,2                      | 100.00%                            | 18                              | 55.80%                       | 113               |
| WT Ribosomes (BY4741)                                                                                                                                                                                                                                                                                                                                                                                                                                                           | 60S ribosomal protein L32 OS= <i>Saccharomyces cerevisiae</i> (strain ATCC 204508 / S288c) GN=RPL32 PE=1 SV=1    | RPL32         | 14 771,8                      | 100.00%                            | 17                              | 54.60%                       | 130               |
| WT Ribosomes (BY4741)                                                                                                                                                                                                                                                                                                                                                                                                                                                           | 60S ribosomal protein L33-A OS= <i>Saccharomyces cerevisiae</i> (strain ATCC 204508 / S288c) GN=RPL33A PE=1 SV=3 | RPL33A        | 12 154,2                      | 100.00%                            | 13                              | 57.00%                       | 107               |
| WT Ribosomes (BY4741)                                                                                                                                                                                                                                                                                                                                                                                                                                                           | 60S ribosomal protein L33-B OS= <i>Saccharomyces cerevisiae</i> (strain ATCC 204508 / S288c) GN=RPL33B PE=1 SV=2 | RPL33B        | 12 168,2                      | 100.00%                            | 5                               | 57.00%                       | 107               |
| WT Ribosomes (BY4741)                                                                                                                                                                                                                                                                                                                                                                                                                                                           | 60S ribosomal protein L34-B OS= <i>Saccharomyces cerevisiae</i> (strain ATCC 204508 / S288c) GN=RPL34B PE=1 SV=1 | RPL34A,RPL34B | 13 639,2                      | 100.00%                            | 4                               | 24.00%                       | 121               |
| WT Ribosomes (BY4741)                                                                                                                                                                                                                                                                                                                                                                                                                                                           | 60S ribosomal protein L35-A OS= <i>Saccharomyces cerevisiae</i> (strain ATCC 204508 / S288c) GN=RPL35A PE=1 SV=1 | RPL35A,RPL35B | 13 910,2                      | 100.00%                            | 28                              | 61.70%                       | 120               |
| WT Ribosomes (BY4741)                                                                                                                                                                                                                                                                                                                                                                                                                                                           | 60S ribosomal protein L36-B OS= <i>Saccharomyces cerevisiae</i> (strain ATCC 204508 / S288c) GN=RPL36B PE=1 SV=3 | RPL36B        | 11 135,9                      | 100.00%                            | 11                              | 50.00%                       | 100               |
| WT Ribosomes (BY4741)                                                                                                                                                                                                                                                                                                                                                                                                                                                           | 60S ribosomal protein L37-A OS= <i>Saccharomyces cerevisiae</i> (strain ATCC 204508 / S288c) GN=RPL37A PE=1 SV=3 | RPL36A        | 11 124,9                      | 100.00%                            | 3                               | 50.00%                       | 100               |
| WT Ribosomes (BY4741)                                                                                                                                                                                                                                                                                                                                                                                                                                                           | 60S ribosomal protein L37-A OS= <i>Saccharomyces cerevisiae</i> (strain ATCC 204508 / S288c) GN=RPL37A PE=1 SV=2 | RPL37A        | 9 850,4                       | 100.00%                            | 10                              | 47.70%                       | 88                |
| WT Ribosomes (BY4741)                                                                                                                                                                                                                                                                                                                                                                                                                                                           | 60S ribosomal protein L37-B OS= <i>Saccharomyces cerevisiae</i> (strain ATCC 204508 / S288c) GN=RPL37B PE=1 SV=2 | RPL37B        | 9 868,3                       | 100.00%                            | 5                               | 46.60%                       | 88                |

|                       |                                                                                                                   |                     |          |         |    |        |     |
|-----------------------|-------------------------------------------------------------------------------------------------------------------|---------------------|----------|---------|----|--------|-----|
| WT Ribosomes (BY4741) | 60S ribosomal protein L38 OS=Saccharomyces cerevisiae (strain ATCC 204508 / S288c) GN=RPL38 PE=1 SV=1             | RPL38               | 8 827,2  | 100.00% | 19 | 62.80% | 78  |
| WT Ribosomes (BY4741) | 60S ribosomal protein L39 OS=Saccharomyces cerevisiae (strain ATCC 204508 / S288c) GN=RPL39 PE=1 SV=3             | RPL39               | 6 342,0  | 100.00% | 4  | 21.60% | 51  |
| WT Ribosomes (BY4741) | Ubiquitin-60S ribosomal protein L40 OS=Saccharomyces cerevisiae (strain ATCC 204508 / S288c) GN=RPL40A PE=1 SV=1  | RPL40A,RPL40B       | 14 554,8 | 100.00% | 5  | 35.90% | 128 |
| WT Ribosomes (BY4741) | 60S ribosomal protein L42-A OS=Saccharomyces cerevisiae (strain ATCC 204508 / S288c) GN=RPL42A PE=1 SV=1          | RPL42A,RPL42B       | 12 211,5 | 100.00% | 13 | 44.30% | 106 |
| WT Ribosomes (BY4741) | 60S ribosomal protein L43-A OS=Saccharomyces cerevisiae (strain ATCC 204508 / S288c) GN=RPL43A PE=1 SV=1          | RPL43A,RPL43B       | 10 090,8 | 100.00% | 15 | 59.80% | 92  |
| WT Ribosomes (BY4741) | 60S acidic ribosomal protein P1-alpha OS=Saccharomyces cerevisiae (strain ATCC 204508 / S288c) GN=RPP1A PE=1 SV=4 | RPP1A               | 10 908,3 | 100.00% | 2  | 28.30% | 106 |
| WT Ribosomes (BY4741) | 60S acidic ribosomal protein P2-beta OS=Saccharomyces cerevisiae (strain ATCC 204508 / S288c) GN=RPP2B PE=1 SV=2  | RPP2B               | 11 050,3 | 100.00% | 16 | 83.60% | 110 |
| WT Ribosomes (BY4741) | 60S acidic ribosomal protein P2-alpha OS=Saccharomyces cerevisiae (strain ATCC 204508 / S288c) GN=RPP2A PE=1 SV=1 | RPP2A               | 10 746,2 | 100.00% | 10 | 56.60% | 106 |
| WT Ribosomes (BY4741) | 60S acidic ribosomal protein P1-beta OS=Saccharomyces cerevisiae (strain ATCC 204508 / S288c) GN=RPP1B PE=1 SV=3  | RPP1B               | 10 668,1 | 100.00% | 2  | 64.20% | 106 |
| WT Ribosomes (BY4741) | 60S acidic ribosomal protein P0 OS=Saccharomyces cerevisiae (strain ATCC 204508 / S288c) GN=RPP0 PE=1 SV=2        | RPP0                | 33 717,4 | 100.00% | 11 | 34.00% | 312 |
| WT Ribosomes (BY4741) | 40S ribosomal protein S0-A OS=Saccharomyces cerevisiae (strain YJM789) GN=RPS0A PE=3 SV=1                         | RPS0A               | 28 024,2 | 100.00% | 19 | 61.10% | 252 |
| WT Ribosomes (BY4741) | 40S ribosomal protein S1-B OS=Saccharomyces cerevisiae (strain YJM789) GN=RPS1B PE=3 SV=1                         | RPS1B               | 28 812,9 | 100.00% | 37 | 69.80% | 255 |
| WT Ribosomes (BY4741) | 40S ribosomal protein S1-A OS=Saccharomyces cerevisiae (strain YJM789) GN=RPS1A PE=3 SV=1                         | RPS1A               | 28 743,8 | 100.00% | 3  | 60.80% | 255 |
| WT Ribosomes (BY4741) | 40S ribosomal protein S2 OS=Saccharomyces cerevisiae (strain ATCC 204508 / S288c) GN=RPS2 PE=1 SV=3               | RPS2                | 27 450,2 | 100.00% | 26 | 57.90% | 254 |
| WT Ribosomes (BY4741) | 40S ribosomal protein S3 OS=Saccharomyces cerevisiae (strain ATCC 204508 / S288c) GN=RPS3 PE=1 SV=5               | RPS3                | 26 503,0 | 100.00% | 41 | 70.40% | 240 |
| WT Ribosomes (BY4741) | 40S ribosomal protein S4-A OS=Saccharomyces cerevisiae (strain ATCC 204508 / S288c) GN=RPS4A PE=1 SV=1            | RPS4A,RPS4B         | 29 411,2 | 100.00% | 40 | 60.90% | 261 |
| WT Ribosomes (BY4741) | 40S ribosomal protein S5 OS=Saccharomyces cerevisiae (strain ATCC 204508 / S288c) GN=RPS5 PE=1 SV=3               | RPS5                | 25 038,5 | 100.00% | 31 | 44.00% | 225 |
| WT Ribosomes (BY4741) | 40S ribosomal protein S6-A OS=Saccharomyces cerevisiae (strain ATCC 204508 / S288c) GN=RPS6A PE=1 SV=1            | RPS6A,RPS6B         | 26 997,2 | 100.00% | 36 | 61.00% | 236 |
| WT Ribosomes (BY4741) | 40S ribosomal protein S7-B OS=Saccharomyces cerevisiae (strain ATCC 204508 / S288c) GN=RPS7B PE=1 SV=1            | RPS7B               | 21 634,7 | 100.00% | 38 | 75.30% | 190 |
| WT Ribosomes (BY4741) | 40S ribosomal protein S7-A OS=Saccharomyces cerevisiae (strain ATCC 204508 / S288c) GN=RPS7A PE=1 SV=4            | RPS7A               | 21 622,7 | 100.00% | 18 | 83.20% | 190 |
| WT Ribosomes (BY4741) | 40S ribosomal protein S8-A OS=Saccharomyces cerevisiae (strain ATCC 204508 / S288c) GN=RPS8A PE=1 SV=1            | RPS8A,RPS8B         | 22 490,4 | 100.00% | 21 | 50.00% | 200 |
| WT Ribosomes (BY4741) | 40S ribosomal protein S9-B OS=Saccharomyces cerevisiae (strain ATCC 204508 / S288c) GN=RPS9B PE=1 SV=4            | RPS9B               | 22 299,7 | 100.00% | 27 | 54.90% | 195 |
| WT Ribosomes (BY4741) | 40S ribosomal protein S10-B OS=Saccharomyces cerevisiae (strain ATCC 204508 / S288c) GN=RPS10B PE=1 SV=1          | RPS10B              | 12 738,7 | 100.00% | 18 | 62.90% | 105 |
| WT Ribosomes (BY4741) | 40S ribosomal protein S11-A OS=Saccharomyces cerevisiae (strain ATCC 204508 / S288c) GN=RPS11A PE=1 SV=1          | RPS11A,RPS11B       | 17 748,8 | 100.00% | 25 | 69.20% | 156 |
| WT Ribosomes (BY4741) | 40S ribosomal protein S12 OS=Saccharomyces cerevisiae (strain ATCC 204508 / S288c) GN=RPS12 PE=1 SV=1             | RPS12               | 15 470,9 | 100.00% | 13 | 46.90% | 143 |
| WT Ribosomes (BY4741) | 40S ribosomal protein S13 OS=Saccharomyces cerevisiae (strain ATCC 204508 / S288c) GN=RPS13 PE=1 SV=3             | RPS13               | 17 029,8 | 100.00% | 12 | 56.30% | 151 |
| WT Ribosomes (BY4741) | 40S ribosomal protein S14-B OS=Saccharomyces cerevisiae (strain ATCC 204508 / S288c) GN=RPS14B PE=1 SV=2          | RPS14B              | 14 649,8 | 100.00% | 29 | 76.80% | 138 |
| WT Ribosomes (BY4741) | 40S ribosomal protein S15 OS=Saccharomyces cerevisiae (strain ATCC 204508 / S288c) GN=RPS15 PE=1 SV=1             | RPS15               | 16 002,2 | 100.00% | 17 | 45.10% | 142 |
| WT Ribosomes (BY4741) | 40S ribosomal protein S16-A OS=Saccharomyces cerevisiae (strain ATCC 204508 / S288c) GN=RPS16A PE=1 SV=1          | RPS16A,RPS16B       | 15 847,9 | 100.00% | 23 | 75.50% | 143 |
| WT Ribosomes (BY4741) | 40S ribosomal protein S17-A OS=Saccharomyces cerevisiae (strain ATCC 204508 / S288c) GN=RPS17A PE=1 SV=1          | RPS17A,RPS17B       | 15 788,9 | 100.00% | 34 | 75.00% | 136 |
| WT Ribosomes (BY4741) | 40S ribosomal protein S18-A OS=Saccharomyces cerevisiae (strain ATCC 204508 / S288c) GN=RPS18A PE=1 SV=1          | RPS18A,RPS18B       | 17 037,9 | 100.00% | 28 | 71.90% | 146 |
| WT Ribosomes (BY4741) | 40S ribosomal protein S19-B OS=Saccharomyces cerevisiae (strain ATCC 204508 / S288c) GN=RPS19B PE=1 SV=2          | RPS19B              | 15 891,3 | 100.00% | 17 | 59.00% | 144 |
| WT Ribosomes (BY4741) | 40S ribosomal protein S20 OS=Saccharomyces cerevisiae (strain ATCC 204508 / S288c) GN=RPS20 PE=1 SV=3             | RPS20               | 13 906,8 | 100.00% | 18 | 71.90% | 121 |
| WT Ribosomes (BY4741) | 40S ribosomal protein S21-B OS=Saccharomyces cerevisiae (strain ATCC 204508 / S288c) GN=RPS21B PE=1 SV=1          | RPS21B              | 9 760,0  | 100.00% | 8  | 75.90% | 87  |
| WT Ribosomes (BY4741) | 40S ribosomal protein S22-A OS=Saccharomyces cerevisiae (strain ATCC 204508 / S288c) GN=RPS22A PE=1 SV=2          | RPS22A,RPS22B       | 14 626,5 | 100.00% | 18 | 78.50% | 130 |
| WT Ribosomes (BY4741) | 40S ribosomal protein S23-A OS=Saccharomyces cerevisiae (strain ATCC 204508 / S288c) GN=RPS23A PE=1 SV=1          | RPS23,RPS23A,RPS23B | 16 038,3 | 100.00% | 16 | 51.70% | 145 |
| WT Ribosomes (BY4741) | 40S ribosomal protein S24-A OS=Saccharomyces cerevisiae (strain ATCC 204508 / S288c) GN=RPS24A PE=1 SV=1          | RPS24A,RPS24B       | 15 329,0 | 100.00% | 26 | 62.20% | 135 |
| WT Ribosomes (BY4741) | 40S ribosomal protein S25-B OS=Saccharomyces cerevisiae (strain ATCC 204508 / S288c) GN=RPS25B PE=1 SV=1          | RPS25A,RPS25B       | 12 009,9 | 100.00% | 18 | 58.30% | 108 |
| WT Ribosomes (BY4741) | 40S ribosomal protein S26-A OS=Saccharomyces cerevisiae (strain ATCC 204508 / S288c) GN=RPS26A PE=1 SV=1          | RPS26A              | 13 505,0 | 100.00% | 7  | 33.60% | 119 |
| WT Ribosomes (BY4741) | 40S ribosomal protein S27-A OS=Saccharomyces cerevisiae (strain ATCC 204508 / S288c) GN=RPS27A PE=1 SV=1          | RPS27A,RPS27B       | 8 879,3  | 100.00% | 8  | 43.90% | 82  |
| WT Ribosomes (BY4741) | 40S ribosomal protein S28-A OS=Saccharomyces cerevisiae (strain ATCC 204508 / S288c) GN=RPS28A PE=1 SV=1          | RPS28A              | 7 591,7  | 100.00% | 14 | 67.20% | 67  |
| WT Ribosomes (BY4741) | 40S ribosomal protein S29-B OS=Saccharomyces cerevisiae (strain ATCC 204508 / S288c) GN=RPS29B PE=1 SV=3          | RPS29B              | 6 727,6  | 100.00% | 7  | 69.60% | 56  |
| WT Ribosomes (BY4741) | 40S ribosomal protein S29-A OS=Saccharomyces cerevisiae (strain ATCC 204508 / S288c) GN=RPS29A PE=1 SV=3          | RPS29A              | 6 660,7  | 100.00% | 9  | 69.60% | 56  |
| WT Ribosomes (BY4741) | 40S ribosomal protein S30-A OS=Saccharomyces cerevisiae (strain ATCC 204508 / S288c) GN=RPS30A PE=1 SV=1          | RPS30A,RPS30B       | 7 118,5  | 100.00% | 8  | 33.30% | 63  |
| WT Ribosomes (BY4741) | Ubiquitin-40S ribosomal protein S31 OS=Saccharomyces cerevisiae (strain ATCC 204508 / S288c) GN=RPS31 PE=1 SV=3   | RPS31               | 17 216,6 | 100.00% | 18 | 59.20% | 152 |

|                       |                                                                                                                           |               |          |         |    |        |     |
|-----------------------|---------------------------------------------------------------------------------------------------------------------------|---------------|----------|---------|----|--------|-----|
| WT Ribosomes (BY4741) | Guanine nucleotide-binding protein subunit beta-like protein OS=Saccharomyces cerevisiae (strain ATCC 204508 / S288c) GN= | ASC1          | 34 805,9 | 100.00% | 28 | 67.40% | 319 |
| SDPM Ribosomes        | 60S ribosomal protein L1-A OS=Saccharomyces cerevisiae (strain ATCC 204508 / S288c) GN=RPL1A PE=1 SV=1                    | RPL1A,RPL1B   | 24 486,3 | 100.00% | 18 | 53.90% | 217 |
| SDPM Ribosomes        | 60S ribosomal protein L2-A OS=Saccharomyces cerevisiae (strain ATCC 204508 / S288c) GN=RPL2A PE=1 SV=1                    | RPL2A,RPL2B   | 27 408,9 | 100.00% | 28 | 55.10% | 254 |
| SDPM Ribosomes        | 60S ribosomal protein L3 OS=Saccharomyces cerevisiae (strain ATCC 204508 / S288c) GN=RPL3 PE=1 SV=4                       | RPL3          | 43 757,9 | 100.00% | 38 | 58.10% | 387 |
| SDPM Ribosomes        | 60S ribosomal protein L4-A OS=Saccharomyces cerevisiae (strain ATCC 204508 / S288c) GN=RPL4A PE=1 SV=4                    | RPL4A         | 39 092,0 | 100.00% | 20 | 50.60% | 362 |
| SDPM Ribosomes        | 60S ribosomal protein L5 OS=Saccharomyces cerevisiae (strain ATCC 204508 / S288c) GN=RPL5 PE=1 SV=4                       | RPL5          | 33 716,1 | 100.00% | 19 | 60.30% | 297 |
| SDPM Ribosomes        | 60S ribosomal protein L6-A OS=Saccharomyces cerevisiae (strain ATCC 204508 / S288c) GN=RPL6A PE=1 SV=2                    | RPL6A         | 19 962,1 | 100.00% | 7  | 72.70% | 176 |
| SDPM Ribosomes        | 60S ribosomal protein L6-B OS=Saccharomyces cerevisiae (strain ATCC 204508 / S288c) GN=RPL6B PE=1 SV=4                    | RPL6B         | 19 986,9 | 100.00% | 18 | 72.70% | 176 |
| SDPM Ribosomes        | 60S ribosomal protein L7-A OS=Saccharomyces cerevisiae (strain ATCC 204508 / S288c) GN=RPL7A PE=1 SV=3                    | RPL7A         | 27 639,6 | 100.00% | 22 | 60.70% | 244 |
| SDPM Ribosomes        | 60S ribosomal protein L8-B OS=Saccharomyces cerevisiae (strain ATCC 204508 / S288c) GN=RPL8B PE=1 SV=3                    | RPL8B         | 28 112,8 | 100.00% | 29 | 71.90% | 256 |
| SDPM Ribosomes        | 60S ribosomal protein L8-A OS=Saccharomyces cerevisiae (strain ATCC 204508 / S288c) GN=RPL8A PE=1 SV=4                    | RPL8A         | 28 125,5 | 100.00% | 7  | 71.90% | 256 |
| SDPM Ribosomes        | 60S ribosomal protein L9-A OS=Saccharomyces cerevisiae (strain ATCC 204508 / S288c) GN=RPL9A PE=1 SV=2                    | RPL9A         | 21 568,8 | 100.00% | 18 | 63.90% | 191 |
| SDPM Ribosomes        | 60S ribosomal protein L10 OS=Saccharomyces cerevisiae (strain ATCC 204508 / S288c) GN=RPL10 PE=1 SV=1                     | RPL10         | 25 362,1 | 100.00% | 25 | 63.80% | 221 |
| SDPM Ribosomes        | 60S ribosomal protein L11-B OS=Saccharomyces cerevisiae (strain ATCC 204508 / S288c) GN=RPL11B PE=1 SV=3                  | RPL11B        | 19 750,0 | 100.00% | 8  | 51.70% | 174 |
| SDPM Ribosomes        | 60S ribosomal protein L12-A OS=Saccharomyces cerevisiae (strain ATCC 204508 / S288c) GN=RPL12A PE=1 SV=1                  | RPL12A,RPL12B | 17 823,2 | 100.00% | 17 | 71.50% | 165 |
| SDPM Ribosomes        | 60S ribosomal protein L13-B OS=Saccharomyces cerevisiae (strain ATCC 204508 / S288c) GN=RPL13B PE=1 SV=1                  | RPL13B        | 22 525,5 | 100.00% | 12 | 53.30% | 199 |
| SDPM Ribosomes        | 60S ribosomal protein L14-A OS=Saccharomyces cerevisiae (strain ATCC 204508 / S288c) GN=RPL14A PE=1 SV=1                  | RPL14A        | 15 167,2 | 100.00% | 9  | 47.10% | 138 |
| SDPM Ribosomes        | 60S ribosomal protein L14-B OS=Saccharomyces cerevisiae (strain ATCC 204508 / S288c) GN=RPL14B PE=1 SV=1                  | RPL14B        | 15 153,2 | 90.00%  | 1  | 41.30% | 138 |
| SDPM Ribosomes        | 60S ribosomal protein L15-A OS=Saccharomyces cerevisiae (strain ATCC 204508 / S288c) GN=RPL15A PE=1 SV=3                  | RPL15A        | 24 422,6 | 100.00% | 7  | 31.40% | 204 |
| SDPM Ribosomes        | 60S ribosomal protein L16-B OS=Saccharomyces cerevisiae (strain ATCC 204508 / S288c) GN=RPL16B PE=1 SV=3                  | RPL16B        | 22 249,9 | 100.00% | 9  | 50.50% | 198 |
| SDPM Ribosomes        | 60S ribosomal protein L16-A OS=Saccharomyces cerevisiae (strain ATCC 204508 / S288c) GN=RPL16A PE=1 SV=3                  | RPL16A        | 22 201,6 | 100.00% | 13 | 46.70% | 199 |
| SDPM Ribosomes        | 60S ribosomal protein L17-A OS=Saccharomyces cerevisiae (strain ATCC 204508 / S288c) GN=RPL17A PE=1 SV=4                  | RPL17A        | 20 549,6 | 100.00% | 18 | 52.20% | 184 |
| SDPM Ribosomes        | 60S ribosomal protein L18-A OS=Saccharomyces cerevisiae (strain ATCC 204508 / S288c) GN=RPL18A PE=1 SV=1                  | RPL18A,RPL18B | 20 563,7 | 100.00% | 11 | 38.70% | 186 |
| SDPM Ribosomes        | 60S ribosomal protein L19-A OS=Saccharomyces cerevisiae (strain ATCC 204508 / S288c) GN=RPL19A PE=1 SV=1                  | RPL19A,RPL19B | 21 704,6 | 100.00% | 20 | 41.80% | 189 |
| SDPM Ribosomes        | 60S ribosomal protein L20-A OS=Saccharomyces cerevisiae (strain ATCC 204508 / S288c) GN=RPL20A PE=1 SV=1                  | RPL20A,RPL20B | 20 437,1 | 100.00% | 10 | 43.00% | 172 |
| SDPM Ribosomes        | 60S ribosomal protein L21-A OS=Saccharomyces cerevisiae (strain ATCC 204508 / S288c) GN=RPL21A PE=1 SV=1                  | RPL21A        | 18 242,0 | 100.00% | 7  | 24.40% | 160 |
| SDPM Ribosomes        | 60S ribosomal protein L22-A OS=Saccharomyces cerevisiae (strain ATCC 204508 / S288c) GN=RPL22A PE=1 SV=3                  | RPL22A        | 13 693,4 | 100.00% | 4  | 58.70% | 121 |
| SDPM Ribosomes        | 60S ribosomal protein L23-A OS=Saccharomyces cerevisiae (strain ATCC 204508 / S288c) GN=RPL23A PE=1 SV=1                  | RPL23A,RPL23B | 14 473,1 | 100.00% | 12 | 43.10% | 137 |
| SDPM Ribosomes        | 60S ribosomal protein L24-B OS=Saccharomyces cerevisiae (strain ATCC 204508 / S288c) GN=RPL24B PE=1 SV=1                  | RPL24B        | 17 548,1 | 100.00% | 10 | 29.70% | 155 |
| SDPM Ribosomes        | 60S ribosomal protein L25 OS=Saccharomyces cerevisiae (strain ATCC 204508 / S288c) GN=RPL25 PE=1 SV=4                     | RPL25         | 15 758,2 | 100.00% | 9  | 47.20% | 142 |
| SDPM Ribosomes        | 60S ribosomal protein L26-B OS=Saccharomyces cerevisiae (strain ATCC 204508 / S288c) GN=RPL26B PE=1 SV=2                  | RPL26B        | 14 235,3 | 100.00% | 13 | 55.10% | 127 |
| SDPM Ribosomes        | 60S ribosomal protein L26-A OS=Saccharomyces cerevisiae (strain ATCC 204508 / S288c) GN=RPL26A PE=1 SV=3                  | RPL26A        | 14 234,3 | 100.00% | 2  | 55.10% | 127 |
| SDPM Ribosomes        | 60S ribosomal protein L27-A OS=Saccharomyces cerevisiae (strain ATCC 204508 / S288c) GN=RPL27A PE=1 SV=1                  | RPL27A        | 15 531,2 | 100.00% | 24 | 59.60% | 136 |
| SDPM Ribosomes        | 60S ribosomal protein L28 OS=Saccharomyces cerevisiae (strain ATCC 204508 / S288c) GN=RPL28 PE=1 SV=3                     | RPL28         | 16 721,9 | 100.00% | 4  | 35.60% | 149 |
| SDPM Ribosomes        | 60S ribosomal protein L30 OS=Saccharomyces cerevisiae (strain ATCC 204508 / S288c) GN=RPL30 PE=1 SV=3                     | RPL30         | 11 416,0 | 100.00% | 15 | 60.00% | 105 |
| SDPM Ribosomes        | 60S ribosomal protein L31-A OS=Saccharomyces cerevisiae (strain ATCC 204508 / S288c) GN=RPL31A PE=1 SV=1                  | RPL31A        | 12 953,2 | 100.00% | 9  | 55.80% | 113 |
| SDPM Ribosomes        | 60S ribosomal protein L32 OS=Saccharomyces cerevisiae (strain ATCC 204508 / S288c) GN=RPL32 PE=1 SV=1                     | RPL32         | 14 771,8 | 100.00% | 13 | 31.50% | 130 |
| SDPM Ribosomes        | 60S ribosomal protein L33-A OS=Saccharomyces cerevisiae (strain ATCC 204508 / S288c) GN=RPL33A PE=1 SV=3                  | RPL33A        | 12 154,2 | 100.00% | 2  | 25.20% | 107 |
| SDPM Ribosomes        | 60S ribosomal protein L33-B OS=Saccharomyces cerevisiae (strain ATCC 204508 / S288c) GN=RPL33B PE=1 SV=2                  | RPL33B        | 12 168,2 | 100.00% | 1  | 25.20% | 107 |
| SDPM Ribosomes        | 60S ribosomal protein L34-A OS=Saccharomyces cerevisiae (strain ATCC 204508 / S288c) GN=RPL34A PE=1 SV=1                  | RPL34A,RPL34B | 13 639,2 | 100.00% | 3  | 20.70% | 121 |
| SDPM Ribosomes        | 60S ribosomal protein L35-A OS=Saccharomyces cerevisiae (strain ATCC 204508 / S288c) GN=RPL35A PE=1 SV=1                  | RPL35A,RPL35B | 13 910,2 | 100.00% | 10 | 45.00% | 120 |
| SDPM Ribosomes        | 60S ribosomal protein L36-B OS=Saccharomyces cerevisiae (strain ATCC 204508 / S288c) GN=RPL36B PE=1 SV=3                  | RPL36B        | 11 135,9 | 100.00% | 1  | 23.00% | 100 |
| SDPM Ribosomes        | 60S ribosomal protein L36-A OS=Saccharomyces cerevisiae (strain ATCC 204508 / S288c) GN=RPL36A PE=1 SV=3                  | RPL36A        | 11 124,9 | 100.00% | 3  | 14.00% | 100 |
| SDPM Ribosomes        | 60S ribosomal protein L37-A OS=Saccharomyces cerevisiae (strain ATCC 204508 / S288c) GN=RPL37A PE=1 SV=2                  | RPL37A        | 9 850,4  | 100.00% | 5  | 38.60% | 88  |
| SDPM Ribosomes        | 60S ribosomal protein L37-B OS=Saccharomyces cerevisiae (strain ATCC 204508 / S288c) GN=RPL37B PE=1 SV=2                  | RPL37B        | 9 868,3  | 48.00%  | 0  | 11.40% | 88  |
| SDPM Ribosomes        | 60S ribosomal protein L38 OS=Saccharomyces cerevisiae (strain ATCC 204508 / S288c) GN=RPL38 PE=1 SV=1                     | RPL38         | 8 827,2  | 100.00% | 8  | 62.80% | 78  |

|                |                                                                                                                                       |                     |          |         |    |        |     |
|----------------|---------------------------------------------------------------------------------------------------------------------------------------|---------------------|----------|---------|----|--------|-----|
| SDPM Ribosomes | 60S ribosomal protein L39 OS=Saccharomyces cerevisiae (strain ATCC 204508 / S288c) GN=RPL39 PE=1 SV=3                                 | RPL39               | 6 342,0  | 100.00% | 4  | 21.60% | 51  |
| SDPM Ribosomes | Ubiquitin-60S ribosomal protein L40 OS=Saccharomyces cerevisiae (strain ATCC 204508 / S288c) GN=RPL40A PE=1 SV=1                      | RPL40A,RPL40B       | 14 554,8 | 99.50%  | 1  | 15.60% | 128 |
| SDPM Ribosomes | 60S ribosomal protein L42-A OS=Saccharomyces cerevisiae (strain ATCC 204508 / S288c) GN=RPL42A PE=1 SV=1                              | RPL42A,RPL42B       | 12 211,5 | 100.00% | 6  | 42.50% | 106 |
| SDPM Ribosomes | 60S ribosomal protein L43-A OS=Saccharomyces cerevisiae (strain ATCC 204508 / S288c) GN=RPL43A PE=1 SV=1                              | RPL43A,RPL43B       | 10 090,8 | 100.00% | 7  | 54.30% | 92  |
| SDPM Ribosomes | 60S acidic ribosomal protein P1-alpha OS=Saccharomyces cerevisiae (strain ATCC 204508 / S288c) GN=RPP1A PE=1 SV=4                     | RPP1A               | 10 908,3 | 100.00% | 3  | 91.50% | 106 |
| SDPM Ribosomes | 60S acidic ribosomal protein P2-beta OS=Saccharomyces cerevisiae (strain ATCC 204508 / S288c) GN=RPP2B PE=1 SV=2                      | RPP2B               | 11 050,3 | 100.00% | 8  | 90.00% | 110 |
| SDPM Ribosomes | 60S acidic ribosomal protein P2-alpha OS=Saccharomyces cerevisiae (strain ATCC 204508 / S288c) GN=RPP2A PE=1 SV=1                     | RPP2A               | 10 746,2 | 100.00% | 8  | 88.70% | 106 |
| SDPM Ribosomes | 60S acidic ribosomal protein P1-beta OS=Saccharomyces cerevisiae (strain ATCC 204508 / S288c) GN=RPP1B PE=1 SV=3                      | RPP1B               | 10 668,1 | 100.00% | 7  | 67.00% | 106 |
| SDPM Ribosomes | 60S acidic ribosomal protein P0 OS=Saccharomyces cerevisiae (strain ATCC 204508 / S288c) GN=RPP0 PE=1 SV=2                            | RPP0                | 33 717,4 | 100.00% | 10 | 46.80% | 312 |
| SDPM Ribosomes | 40S ribosomal protein S0-B OS=Saccharomyces cerevisiae (strain RM11-1a) GN=RPS0B PE=3 SV=1                                            | RPS0B               | 27 962,3 | 100.00% | 18 | 79.00% | 252 |
| SDPM Ribosomes | 40S ribosomal protein S1-B OS=Saccharomyces cerevisiae (strain RM11-1a) GN=RPS1B PE=3 SV=1                                            | RPS1B               | 28 812,9 | 100.00% | 27 | 65.50% | 255 |
| SDPM Ribosomes | 40S ribosomal protein S1-A OS=Saccharomyces cerevisiae (strain RM11-1a) GN=RPS1A PE=3 SV=1                                            | RPS1A               | 28 743,8 | 100.00% | 3  | 62.00% | 255 |
| SDPM Ribosomes | 40S ribosomal protein S2 OS=Saccharomyces cerevisiae (strain ATCC 204508 / S288c) GN=RPS2 PE=1 SV=3                                   | RPS2                | 27 450,2 | 100.00% | 21 | 68.90% | 254 |
| SDPM Ribosomes | 40S ribosomal protein S3 OS=Saccharomyces cerevisiae (strain ATCC 204508 / S288c) GN=RPS3 PE=1 SV=5                                   | RPS3                | 26 503,0 | 100.00% | 21 | 60.80% | 240 |
| SDPM Ribosomes | 40S ribosomal protein S4-A OS=Saccharomyces cerevisiae (strain ATCC 204508 / S288c) GN=RPS4A PE=1 SV=1                                | RPS4A,RPS4B         | 29 411,2 | 100.00% | 34 | 65.50% | 261 |
| SDPM Ribosomes | 40S ribosomal protein S5 OS=Saccharomyces cerevisiae (strain ATCC 204508 / S288c) GN=RPS5 PE=1 SV=3                                   | RPS5                | 25 038,5 | 100.00% | 33 | 78.70% | 225 |
| SDPM Ribosomes | 40S ribosomal protein S6-A OS=Saccharomyces cerevisiae (strain ATCC 204508 / S288c) GN=RPS6A PE=1 SV=1                                | RPS6A,RPS6B         | 26 997,2 | 100.00% | 28 | 63.10% | 236 |
| SDPM Ribosomes | 40S ribosomal protein S7-B OS=Saccharomyces cerevisiae (strain ATCC 204508 / S288c) GN=RPS7B PE=1 SV=1                                | RPS7B               | 21 634,7 | 100.00% | 21 | 63.70% | 190 |
| SDPM Ribosomes | 40S ribosomal protein S7-A OS=Saccharomyces cerevisiae (strain ATCC 204508 / S288c) GN=RPS7A PE=1 SV=4                                | RPS7A               | 21 622,7 | 100.00% | 10 | 63.70% | 190 |
| SDPM Ribosomes | 40S ribosomal protein S8-A OS=Saccharomyces cerevisiae (strain ATCC 204508 / S288c) GN=RPS8A PE=1 SV=1                                | RPS8A,RPS8B         | 22 490,4 | 100.00% | 14 | 55.50% | 200 |
| SDPM Ribosomes | 40S ribosomal protein S9-B OS=Saccharomyces cerevisiae (strain ATCC 204508 / S288c) GN=RPS9B PE=1 SV=4                                | RPS9B               | 22 299,7 | 100.00% | 17 | 50.80% | 195 |
| SDPM Ribosomes | 40S ribosomal protein S10-B OS=Saccharomyces cerevisiae (strain ATCC 204508 / S288c) GN=RPS10B PE=1 SV=1                              | RPS10B              | 12 738,7 | 100.00% | 11 | 62.90% | 105 |
| SDPM Ribosomes | 40S ribosomal protein S11-A OS=Saccharomyces cerevisiae (strain ATCC 204508 / S288c) GN=RPS11A PE=1 SV=1                              | RPS11A,RPS11B       | 17 748,8 | 100.00% | 17 | 56.40% | 156 |
| SDPM Ribosomes | 40S ribosomal protein S12 OS=Saccharomyces cerevisiae (strain ATCC 204508 / S288c) GN=RPS12 PE=1 SV=1                                 | RPS12               | 15 470,9 | 100.00% | 10 | 65.00% | 143 |
| SDPM Ribosomes | 40S ribosomal protein S13 OS=Saccharomyces cerevisiae (strain ATCC 204508 / S288c) GN=RPS13 PE=1 SV=3                                 | RPS13               | 17 029,8 | 100.00% | 10 | 50.30% | 151 |
| SDPM Ribosomes | 40S ribosomal protein S14-B OS=Saccharomyces cerevisiae (strain ATCC 204508 / S288c) GN=RPS14B PE=1 SV=2                              | RPS14B              | 14 649,8 | 100.00% | 14 | 63.80% | 138 |
| SDPM Ribosomes | 40S ribosomal protein S15 OS=Saccharomyces cerevisiae (strain ATCC 204508 / S288c) GN=RPS15 PE=1 SV=1                                 | RPS15               | 16 002,2 | 100.00% | 12 | 57.70% | 142 |
| SDPM Ribosomes | 40S ribosomal protein S16-A OS=Saccharomyces cerevisiae (strain ATCC 204508 / S288c) GN=RPS16A PE=1 SV=1                              | RPS16A,RPS16B       | 15 847,9 | 100.00% | 14 | 62.90% | 143 |
| SDPM Ribosomes | 40S ribosomal protein S17-A OS=Saccharomyces cerevisiae (strain ATCC 204508 / S288c) GN=RPS17A PE=1 SV=1                              | RPS17A,RPS17B       | 15 788,9 | 100.00% | 14 | 50.70% | 136 |
| SDPM Ribosomes | 40S ribosomal protein S18-A OS=Saccharomyces cerevisiae (strain ATCC 204508 / S288c) GN=RPS18A PE=1 SV=1                              | RPS18A,RPS18B       | 17 037,9 | 100.00% | 21 | 69.20% | 146 |
| SDPM Ribosomes | 40S ribosomal protein S19-A OS=Saccharomyces cerevisiae (strain ATCC 204508 / S288c) GN=RPS19A PE=1 SV=2                              | RPS19A              | 15 917,4 | 100.00% | 15 | 83.30% | 144 |
| SDPM Ribosomes | 40S ribosomal protein S20 OS=Saccharomyces cerevisiae (strain ATCC 204508 / S288c) GN=RPS20 PE=1 SV=3                                 | RPS20               | 13 906,8 | 100.00% | 9  | 54.50% | 121 |
| SDPM Ribosomes | 40S ribosomal protein S21-B OS=Saccharomyces cerevisiae (strain ATCC 204508 / S288c) GN=RPS21B PE=1 SV=1                              | RPS21B              | 9 760,0  | 100.00% | 6  | 72.40% | 87  |
| SDPM Ribosomes | 40S ribosomal protein S22-A OS=Saccharomyces cerevisiae (strain ATCC 204508 / S288c) GN=RPS22A PE=1 SV=2                              | RPS22A,RPS22B       | 14 626,5 | 100.00% | 19 | 82.30% | 130 |
| SDPM Ribosomes | 40S ribosomal protein S23-A OS=Naumovozyma castellii (strain ATCC 76901 / CBS 4309 / NBRC 1992 / NRRL Y-12630) GN=RPS23,RPS23A,RPS23B | RPS23,RPS23A,RPS23B | 16 038,3 | 100.00% | 13 | 39.30% | 145 |
| SDPM Ribosomes | 40S ribosomal protein S24-A OS=Saccharomyces cerevisiae (strain ATCC 204508 / S288c) GN=RPS24A PE=1 SV=1                              | RPS24A,RPS24B       | 15 329,0 | 100.00% | 12 | 44.40% | 135 |
| SDPM Ribosomes | 40S ribosomal protein S25-A OS=Saccharomyces cerevisiae (strain ATCC 204508 / S288c) GN=RPS25A PE=1 SV=1                              | RPS25A,RPS25B       | 12 009,9 | 100.00% | 13 | 57.40% | 108 |
| SDPM Ribosomes | 40S ribosomal protein S26-A OS=Saccharomyces cerevisiae (strain ATCC 204508 / S288c) GN=RPS26A PE=1 SV=1                              | RPS26A,RPS26B       | 13 505,0 | 100.00% | 5  | 33.60% | 119 |
| SDPM Ribosomes | 40S ribosomal protein S27-B OS=Saccharomyces cerevisiae (strain ATCC 204508 / S288c) GN=RPS27B PE=1 SV=1                              | RPS27B              | 8 865,2  | 100.00% | 4  | 62.20% | 82  |
| SDPM Ribosomes | 40S ribosomal protein S28-A OS=Saccharomyces cerevisiae (strain ATCC 204508 / S288c) GN=RPS28A PE=1 SV=1                              | RPS28A,RPS28B       | 7 591,7  | 100.00% | 8  | 53.70% | 67  |
| SDPM Ribosomes | 40S ribosomal protein S29-B OS=Saccharomyces cerevisiae (strain ATCC 204508 / S288c) GN=RPS29B PE=1 SV=3                              | RPS29B              | 6 727,6  | 100.00% | 3  | 69.60% | 56  |
| SDPM Ribosomes | 40S ribosomal protein S29-A OS=Saccharomyces cerevisiae (strain ATCC 204508 / S288c) GN=RPS29A PE=1 SV=3                              | RPS29A              | 6 660,7  | 100.00% | 3  | 51.80% | 56  |
| SDPM Ribosomes | 40S ribosomal protein S30-A OS=Saccharomyces cerevisiae (strain ATCC 204508 / S288c) GN=RPS30A PE=1 SV=1                              | RPS30A,RPS30B       | 7 118,5  | 100.00% | 3  | 36.50% | 63  |
| SDPM Ribosomes | Ubiquitin-40S ribosomal protein S31 OS=Saccharomyces cerevisiae (strain ATCC 204508 / S288c) GN=RPS31 PE=1 SV=3                       | RPS31               | 17 216,6 | 100.00% | 11 | 38.20% | 152 |
| SDPM Ribosomes | Guanine nucleotide-binding protein subunit beta-like protein OS=Saccharomyces cerevisiae (strain ATCC 204508 / S288c) GN=ASC1         | ASC1                | 34 805,9 | 100.00% | 30 | 79.00% | 319 |

Mass spectrometry analysis was performed on purified ribosomal samples (20 pmole of WT and SDPM ribosomes). Samples were subjected to trypsin digestion and peptides were further identified by tandem mass spectrometry (MS/MS). Peptide and protein identifications were performed using the MASCOT search engine against a uniprot-yeast database. Database searches were performed using trypsin cleavage specificity with two possible missed cleavages. Carbamidomethylation of cysteines was set as fixed modification and oxidation of methionines as variable modifications. Peptide and fragment tolerances were set at 10 ppm and 0.6 Da respectively. Only ions with a score higher than the identity threshold and a false-positive discovery rate (FDR) of less than 1% (Mascot decoy option) were considered.
